# Supplementary material for: Stable climate simulations using a realistic GCM with neural network parameterizations for atmospheric moist physics and radiation processes
Source: Copernicus journal article supplement (doi:10.5194/gmd-2021-299), 2021-09-29

a) Heating NN Parameterization

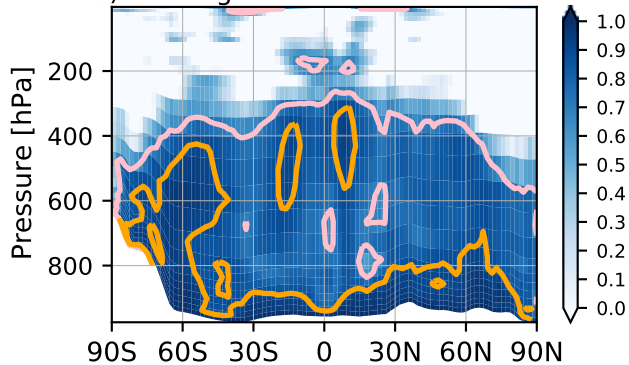

b) Moistening NN Parameterization

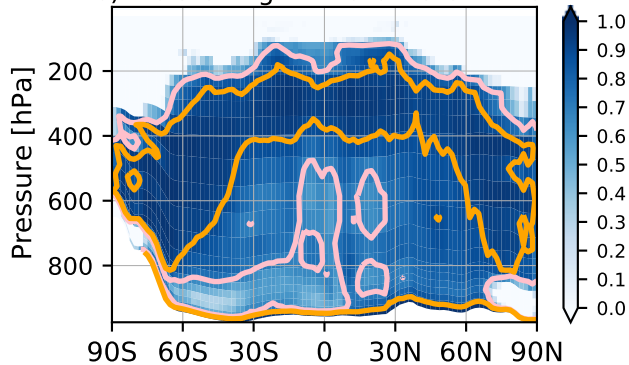

c) Heating CAM Parameterization

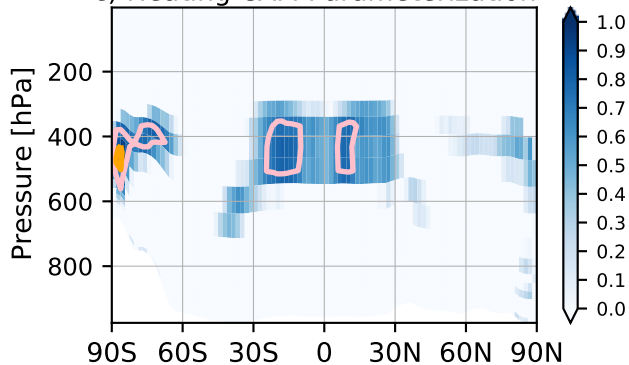

d) Moistening CAM Parameterization

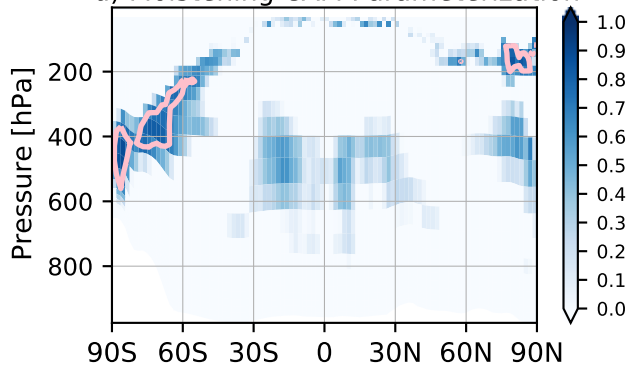

Supplement: Supplementary file 7 [file gmd-2021-299-supplement-version1.zip]
