# Supplementary material for: Stable climate simulations using a realistic GCM with neural network parameterizations for atmospheric moist physics and radiation processes
Source: Copernicus journal article supplement (doi:10.5194/gmd-2021-299), 2021-09-29

**a) Diff NNCAM JJA Bias:0.002**

**mm/day**

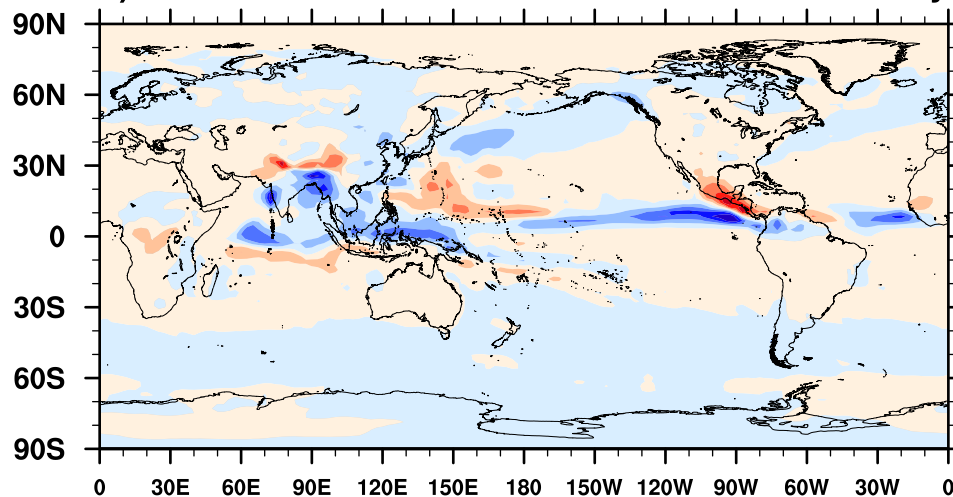

**b) Diff NNCAM DJF Bias:-0.011**

**mm/day**

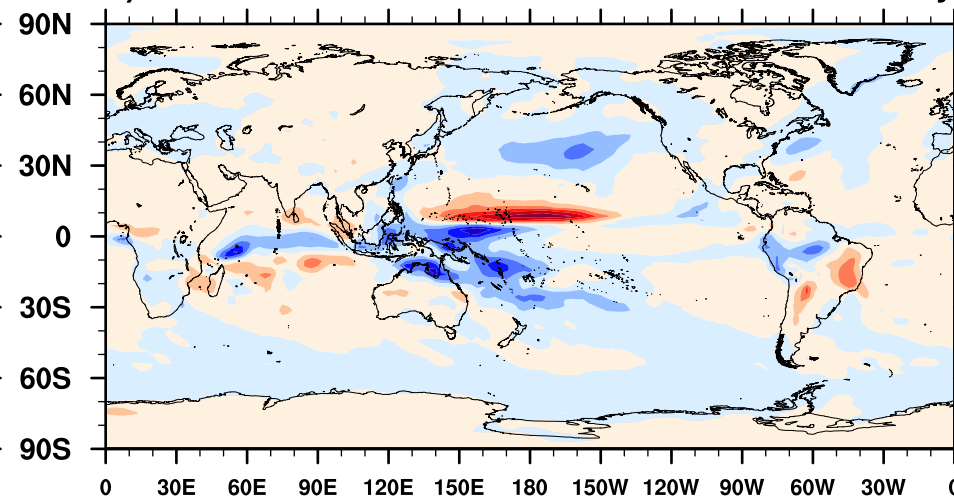

**c) Diff CAM5 JJA Bias:0.148**

**mm/day**

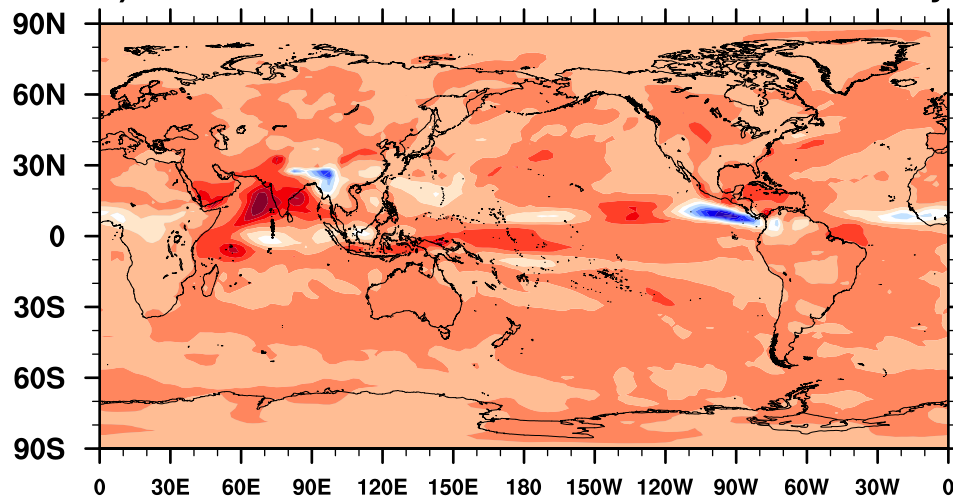

**d) Diff CAM5 DJF Bias:0.145**

**mm/day**

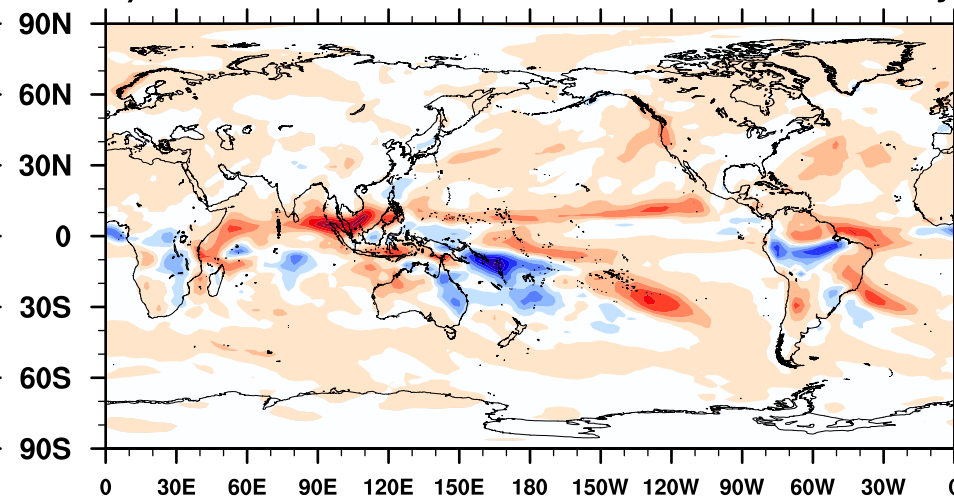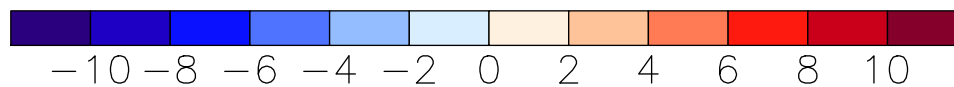

Supplement: Supplementary file 8 [file gmd-2021-299-supplement-version1.zip]
