# Supplementary figures and images for: Stable climate simulations using a realistic GCM with neural network parameterizations for atmospheric moist physics and radiation processes
Source: Copernicus journal article supplement (doi:10.5194/gmd-2021-299), 2021-09-29

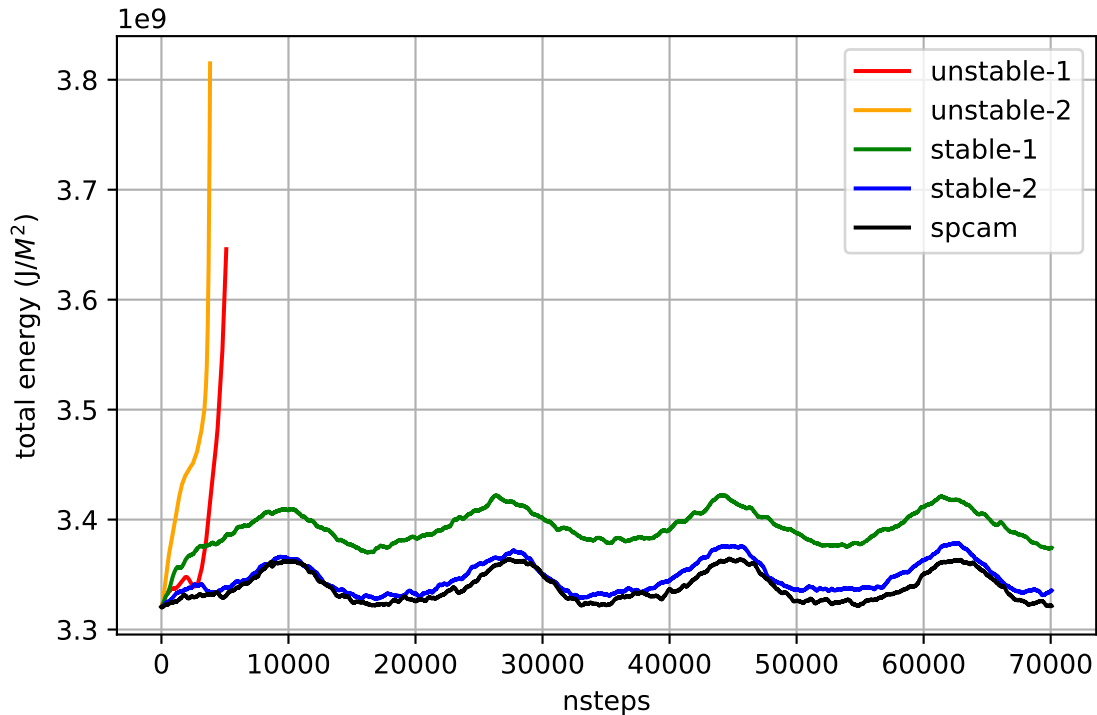

Supplement: Supplementary file 1 [file gmd-2021-299-supplement-version1.zip]

**SPCAM, winter: 19991001-20031231**

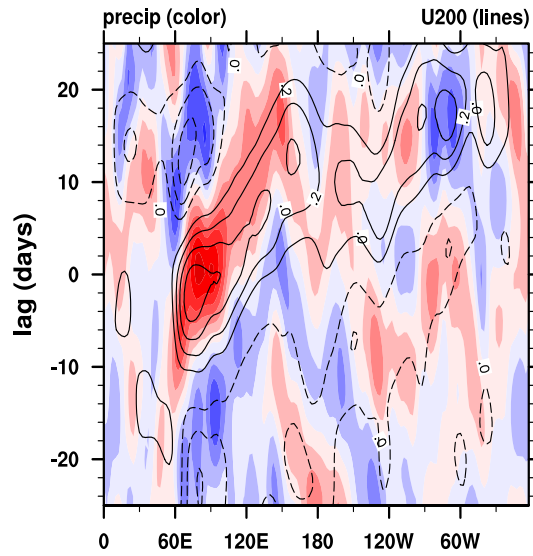

**NNCAM, winter: 19991001-20031231**

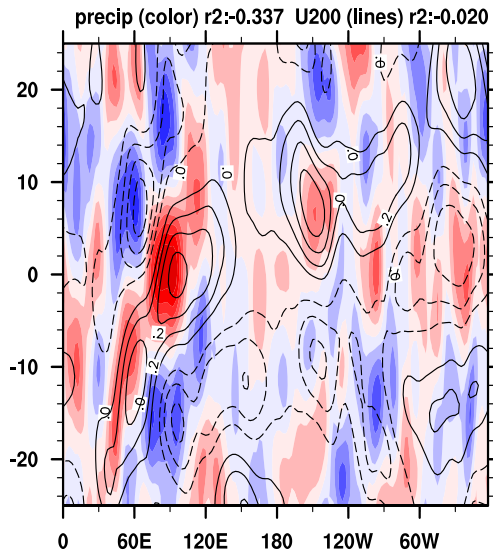

**CAM5, winter: 19991001-20031231**

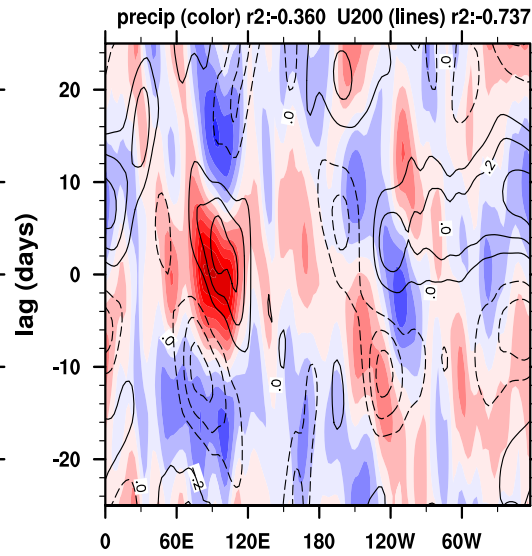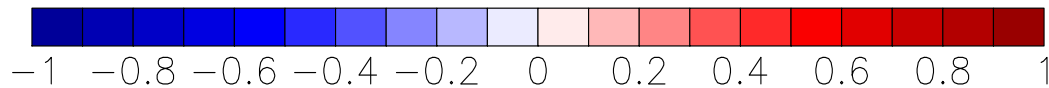

Supplement: Supplementary file 2 [file gmd-2021-299-supplement-version1.zip]

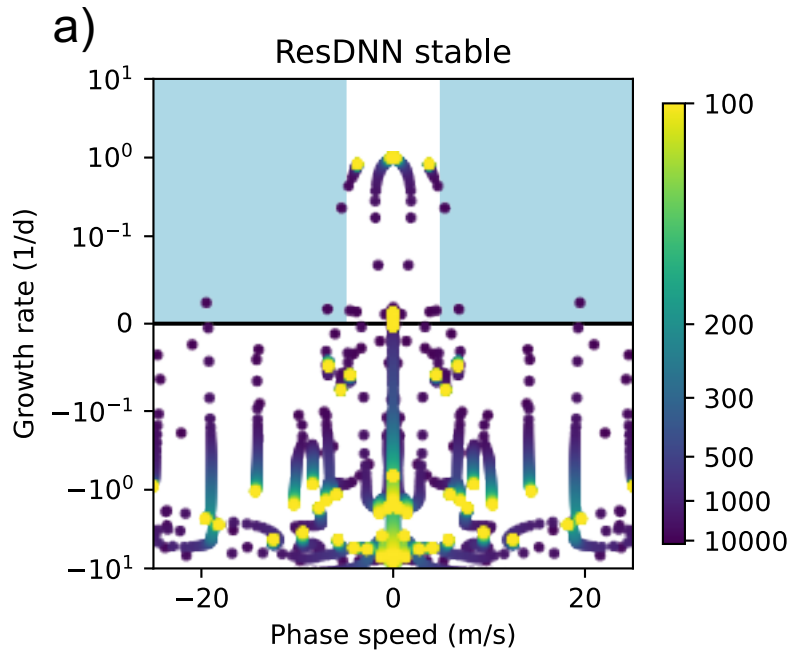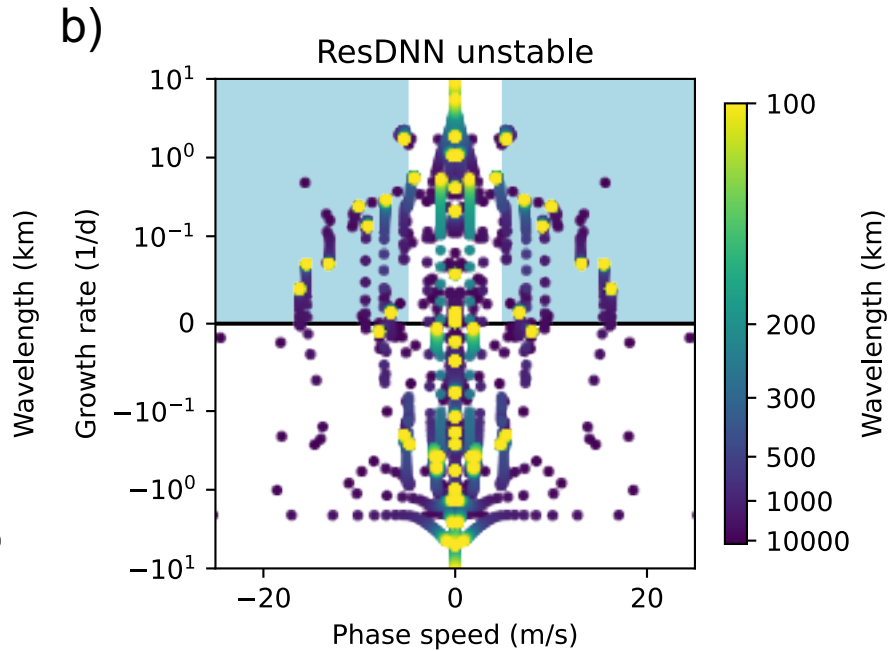

Supplement: Supplementary file 3 [file gmd-2021-299-supplement-version1.zip]

a) SPCAM, winter: 19990101-20031231

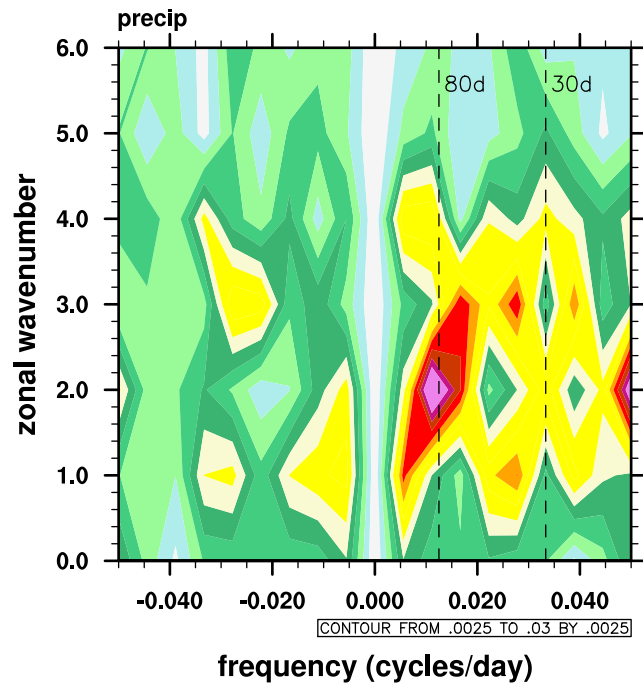

b) NNCAM, winter: 19990101-20031231

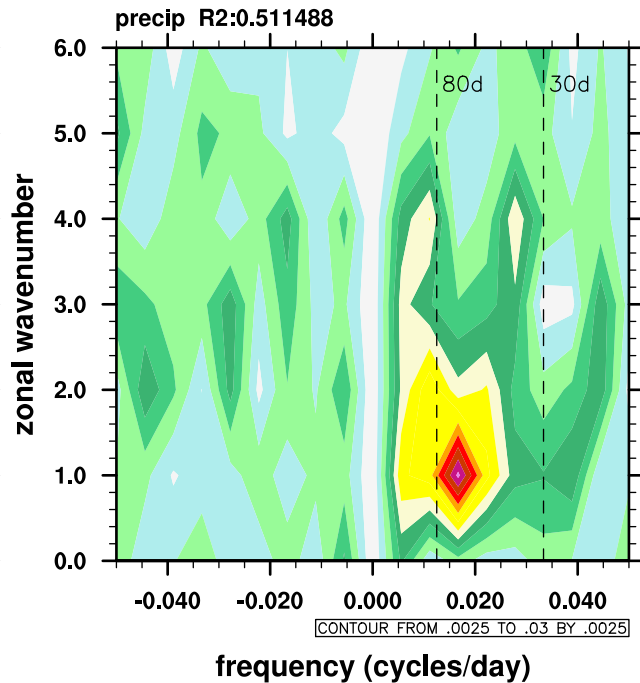

c) CAM5, winter: 19990101-20031231

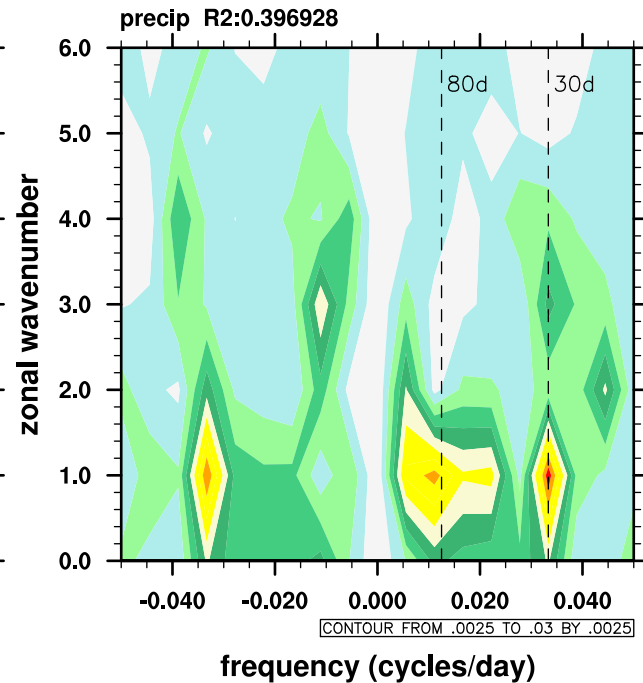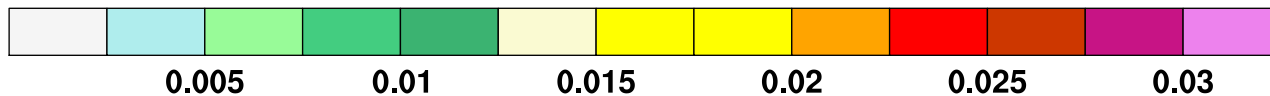

Supplement: Supplementary file 4 [file gmd-2021-299-supplement-version1.zip]

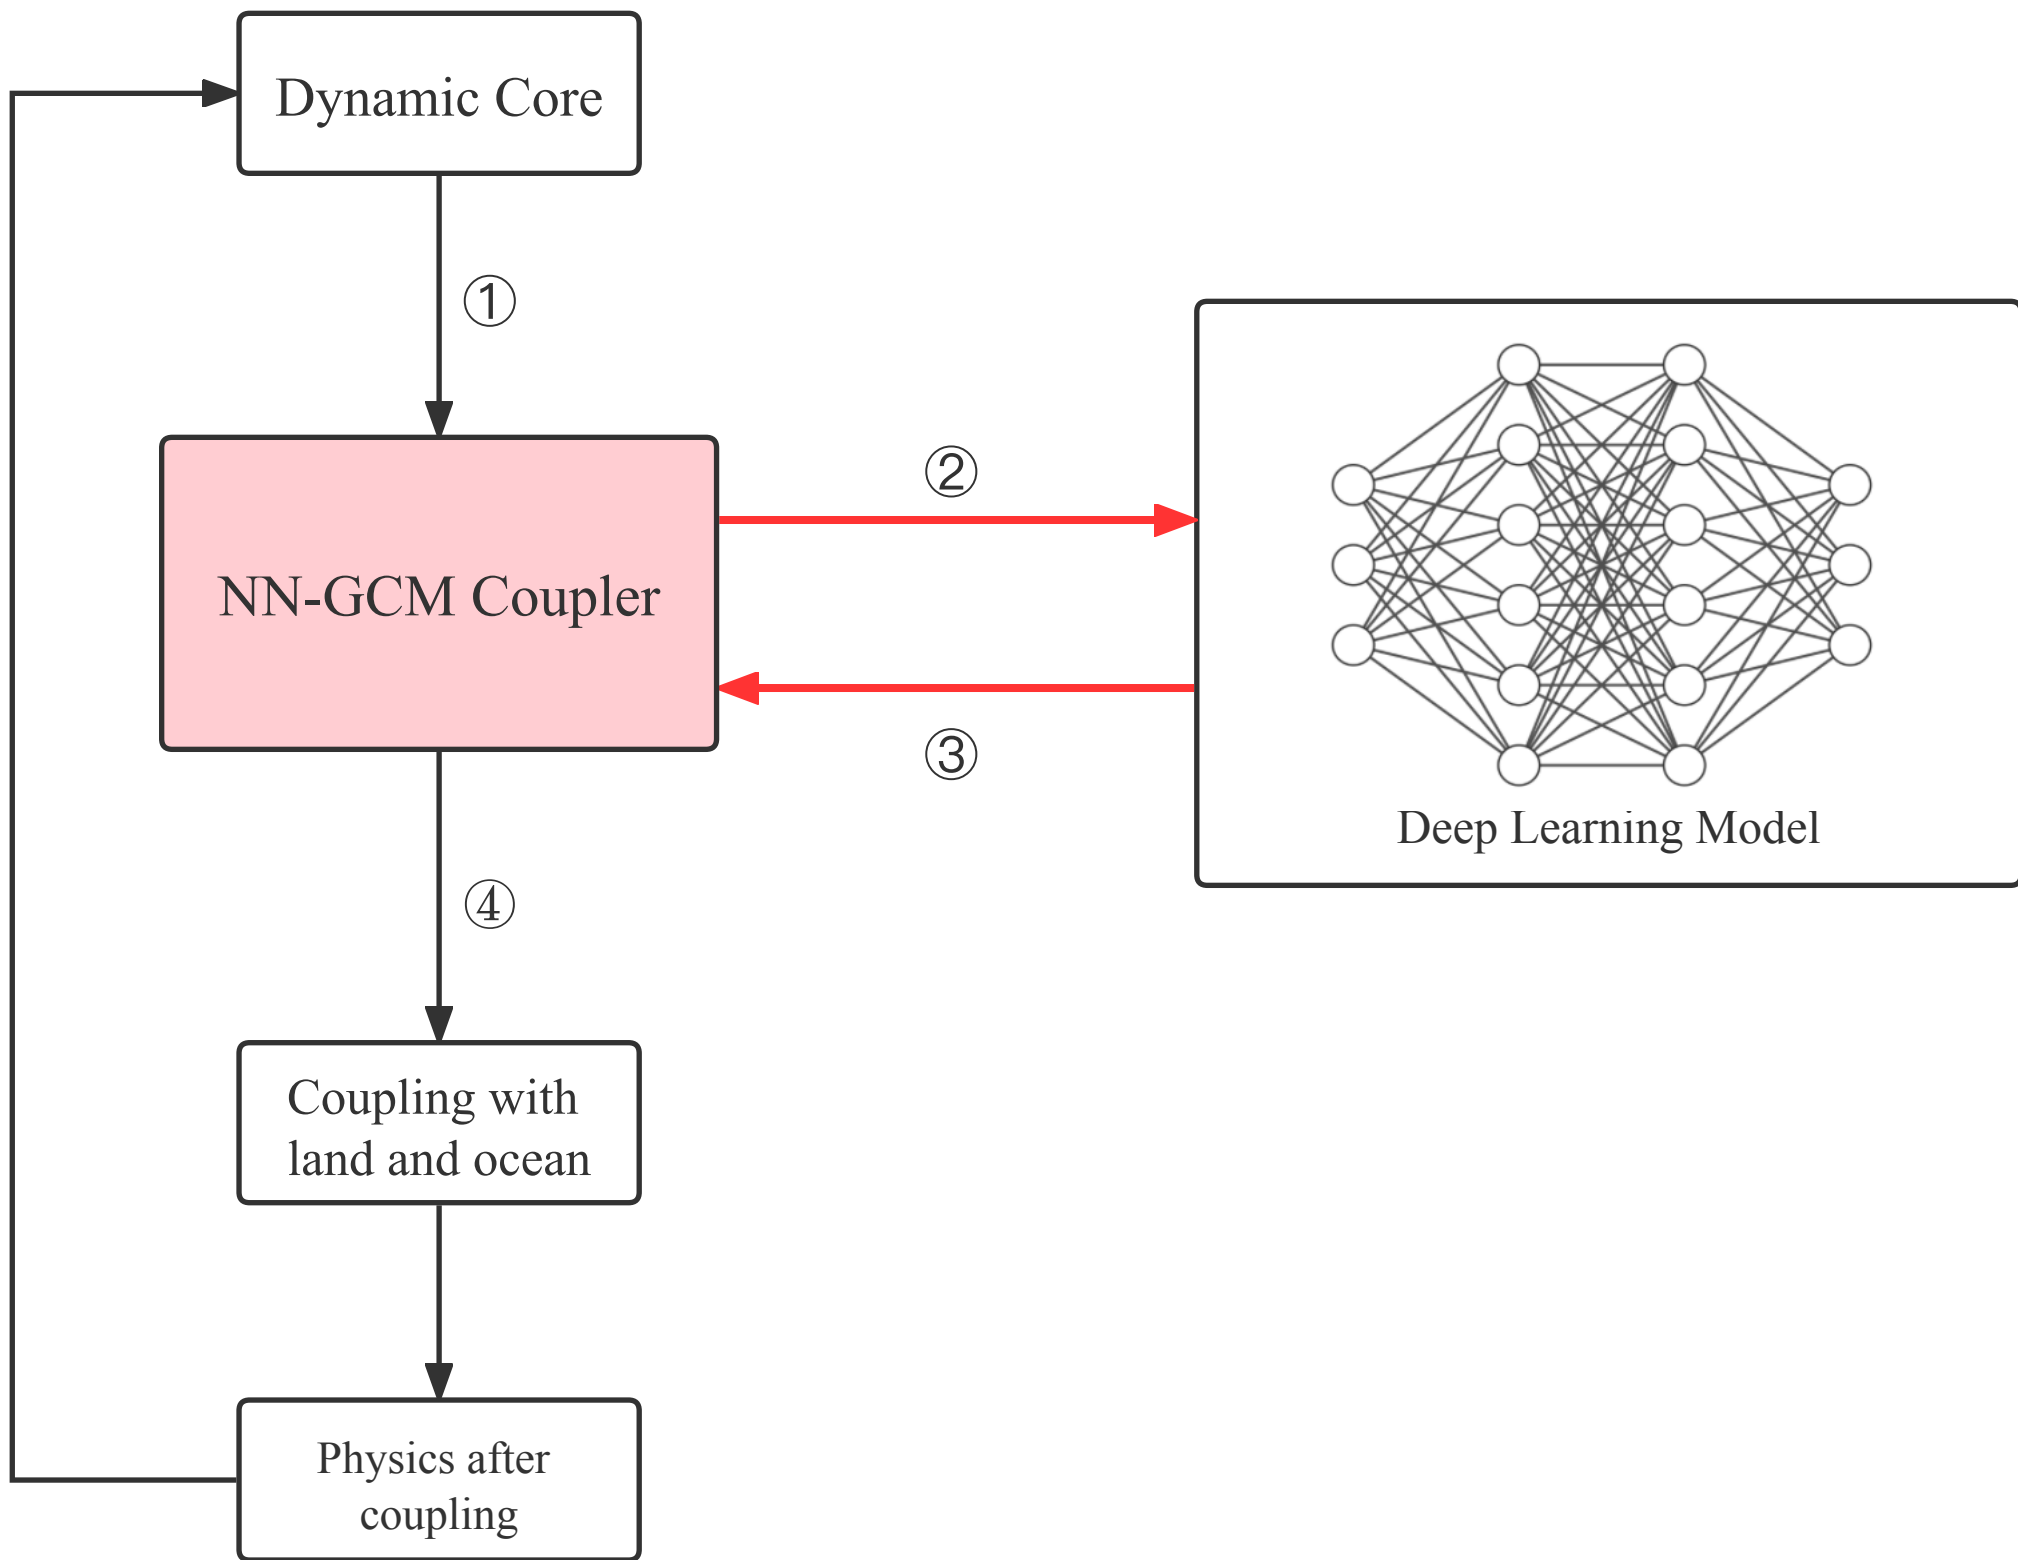

Supplement: Supplementary file 5 [file gmd-2021-299-supplement-version1.zip]

(a)  $dh$

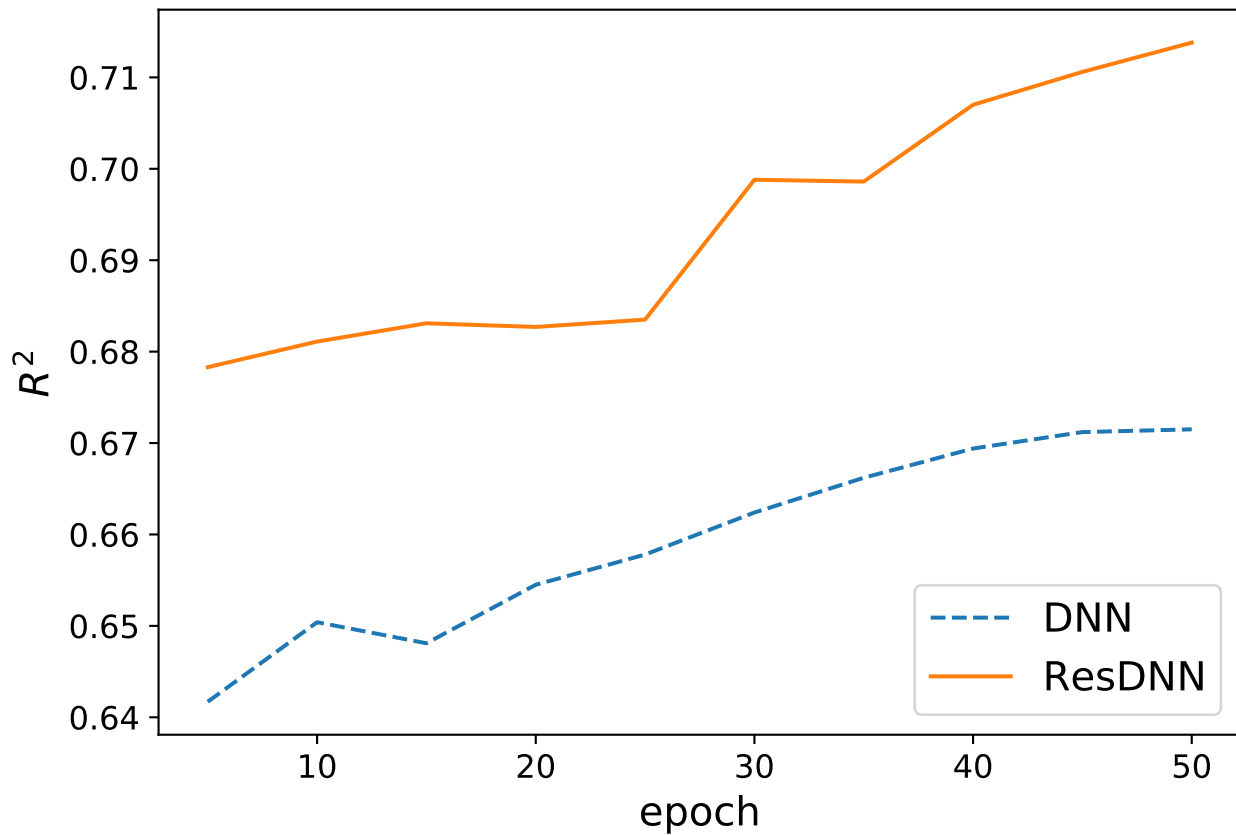

(b) Radiation Fluxes

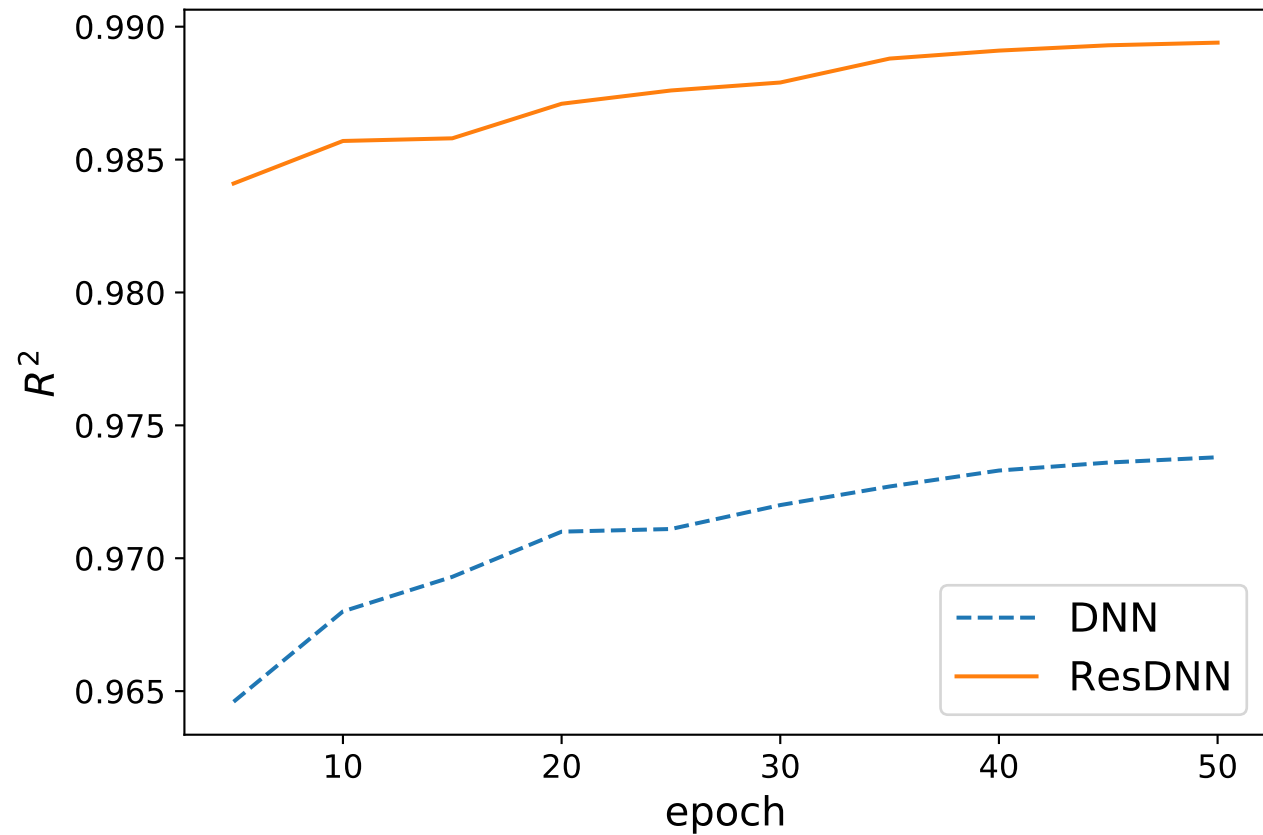

Supplement: Supplementary file 6 [file gmd-2021-299-supplement-version1.zip]

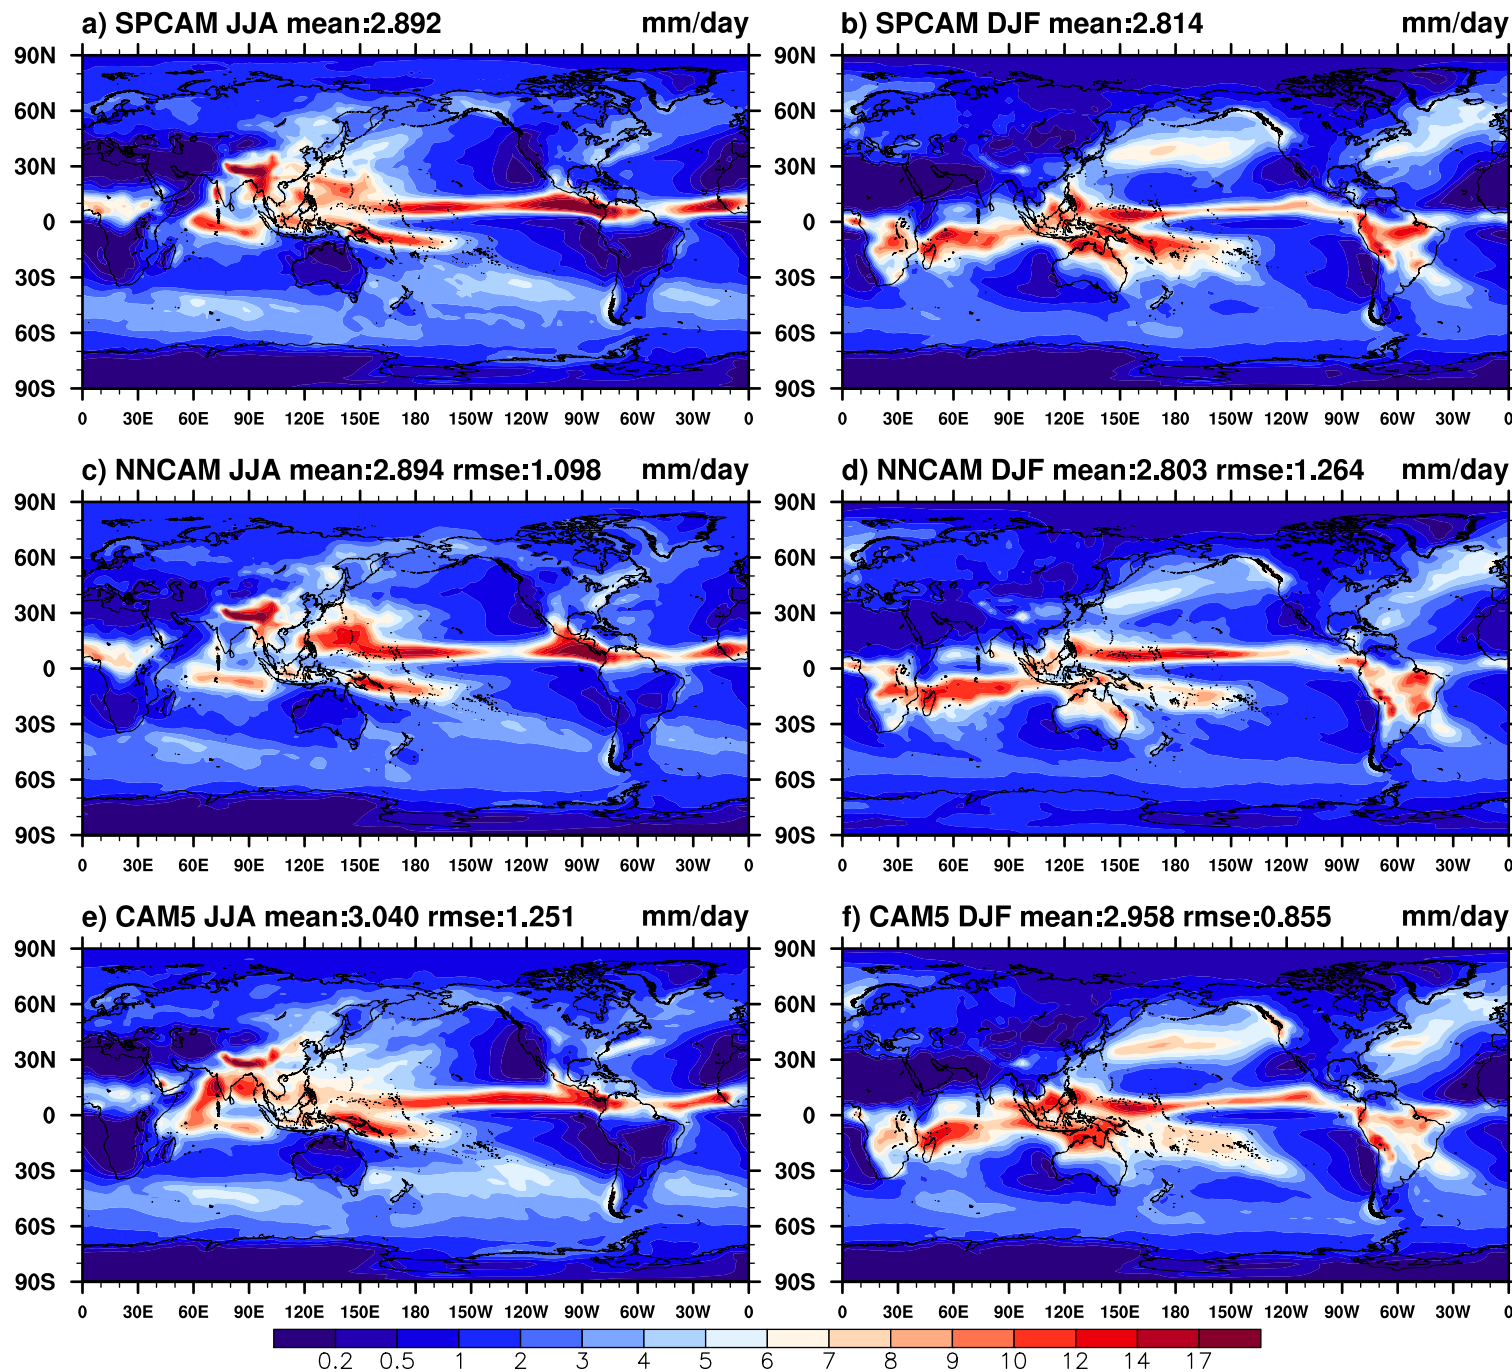

Supplement: Supplementary file 9 [file gmd-2021-299-supplement-version1.zip]

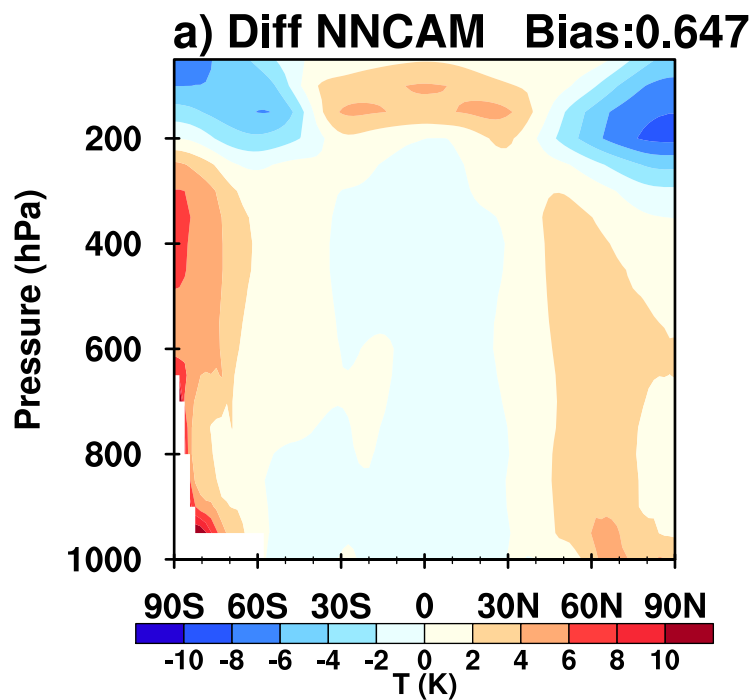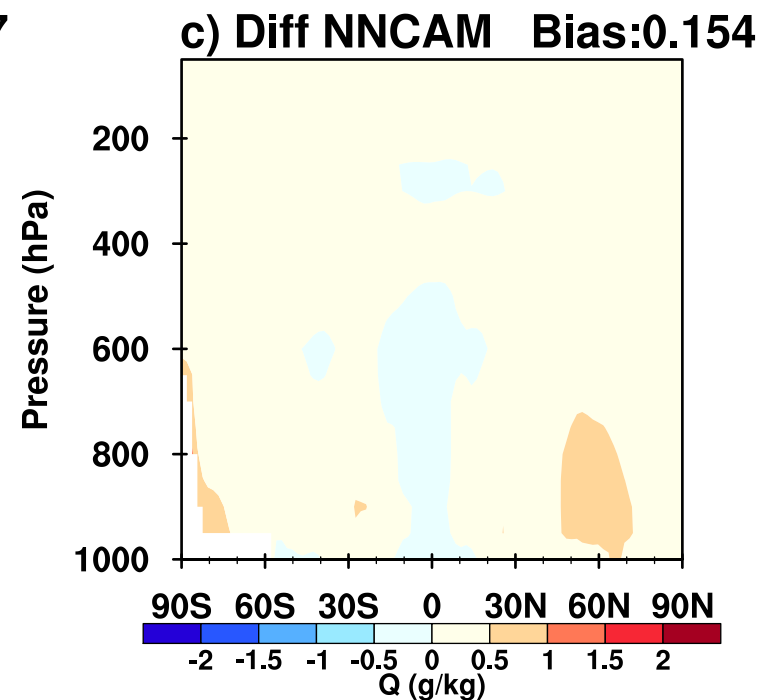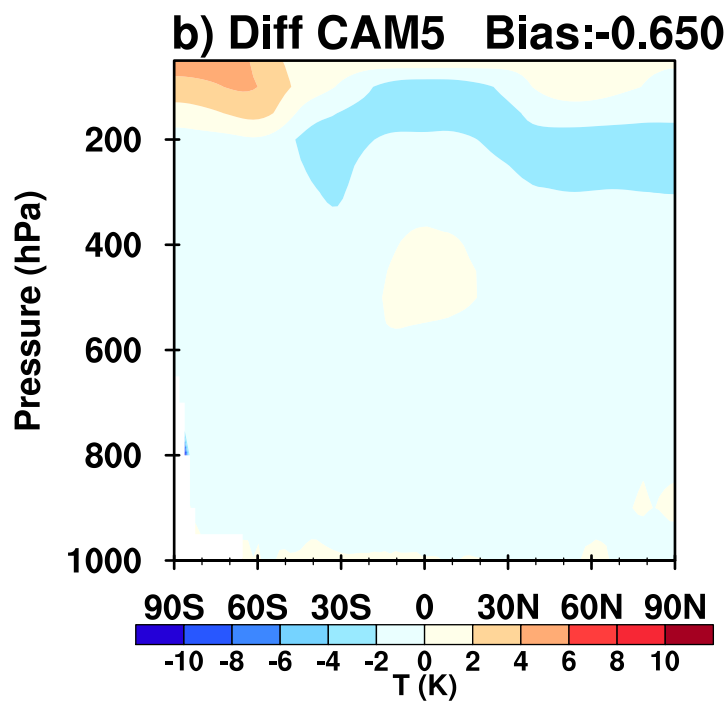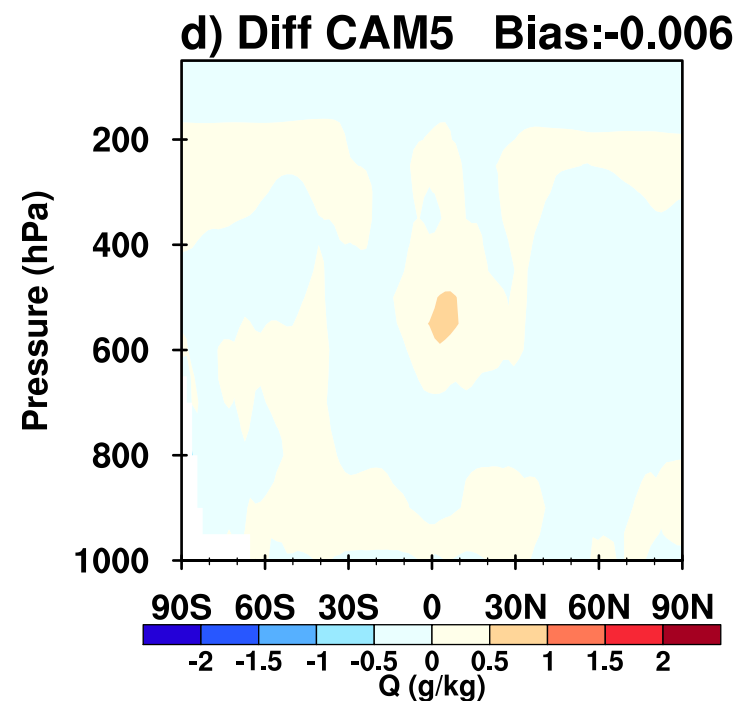

Supplement: Supplementary file 10 [file gmd-2021-299-supplement-version1.zip]

a) SPCAM

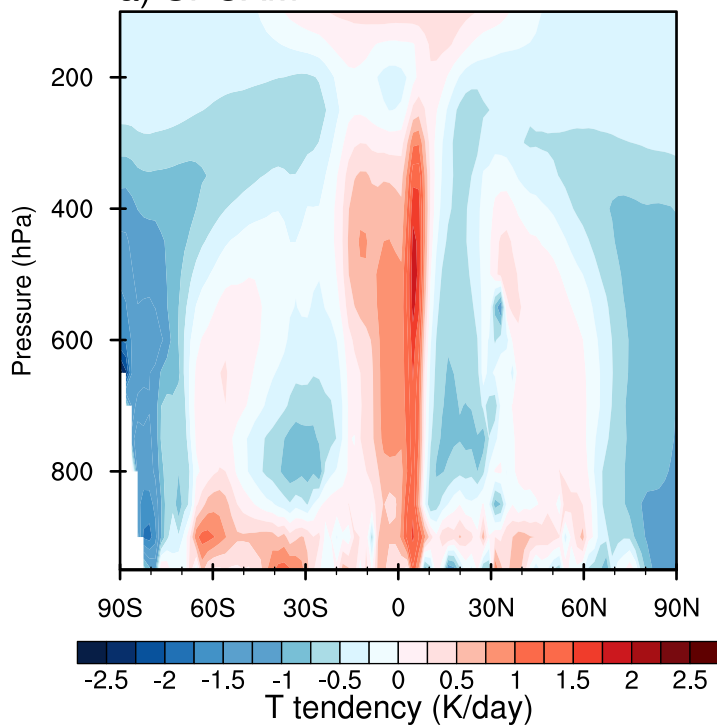

b) NN-Parameterization

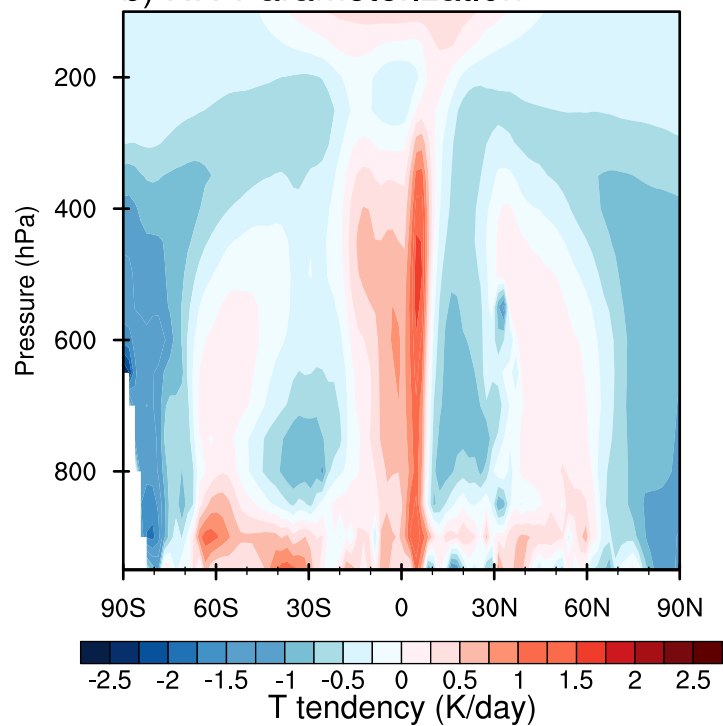

c) SPCAM

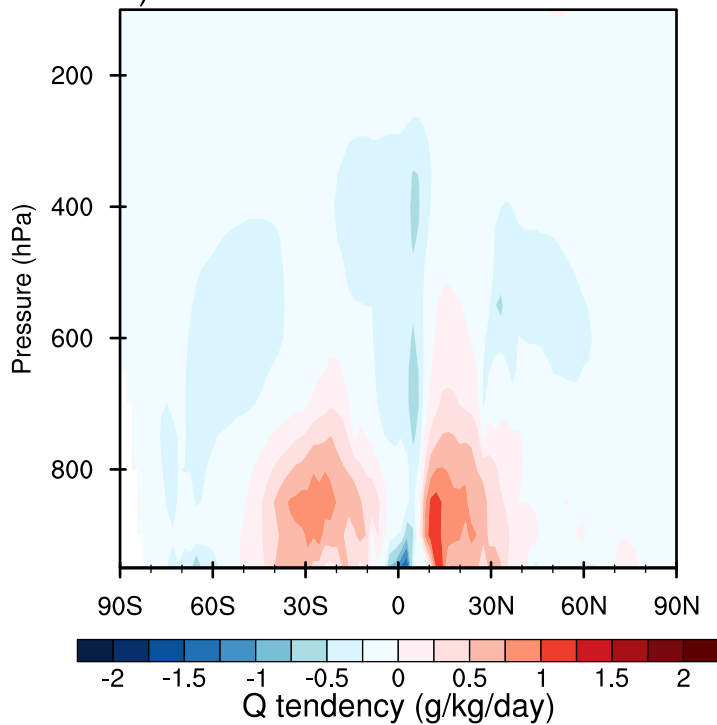

d) NN-Parameterization

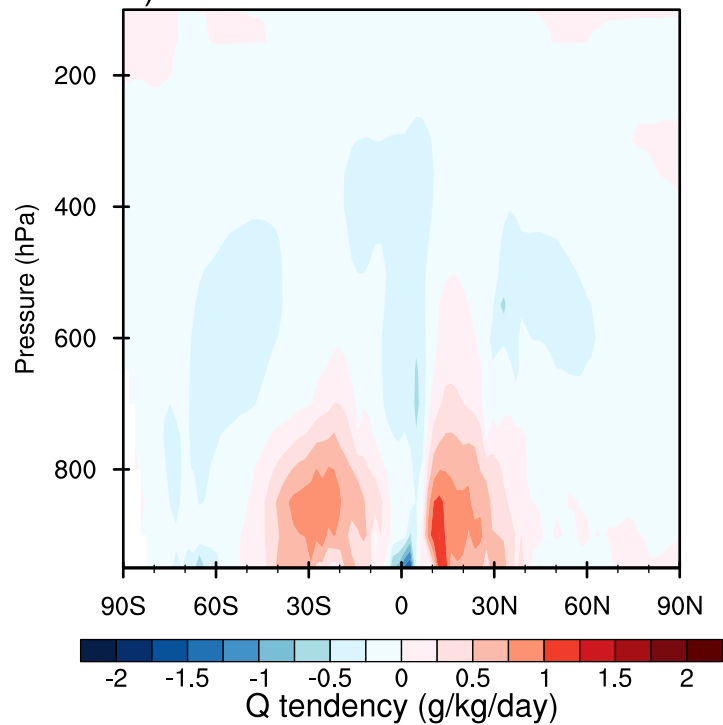

Supplement: Supplementary file 11 [file gmd-2021-299-supplement-version1.zip]

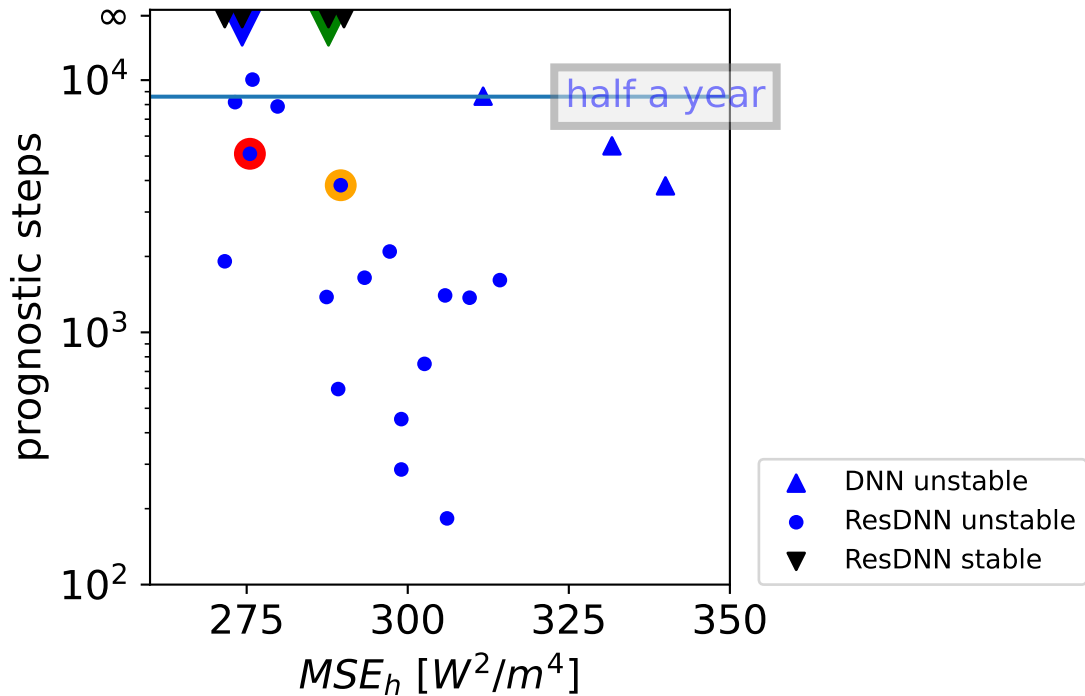

Supplement: Supplementary file 12 [file gmd-2021-299-supplement-version1.zip]

# Precipitation 1999-2003 Bin size: 1mm/day

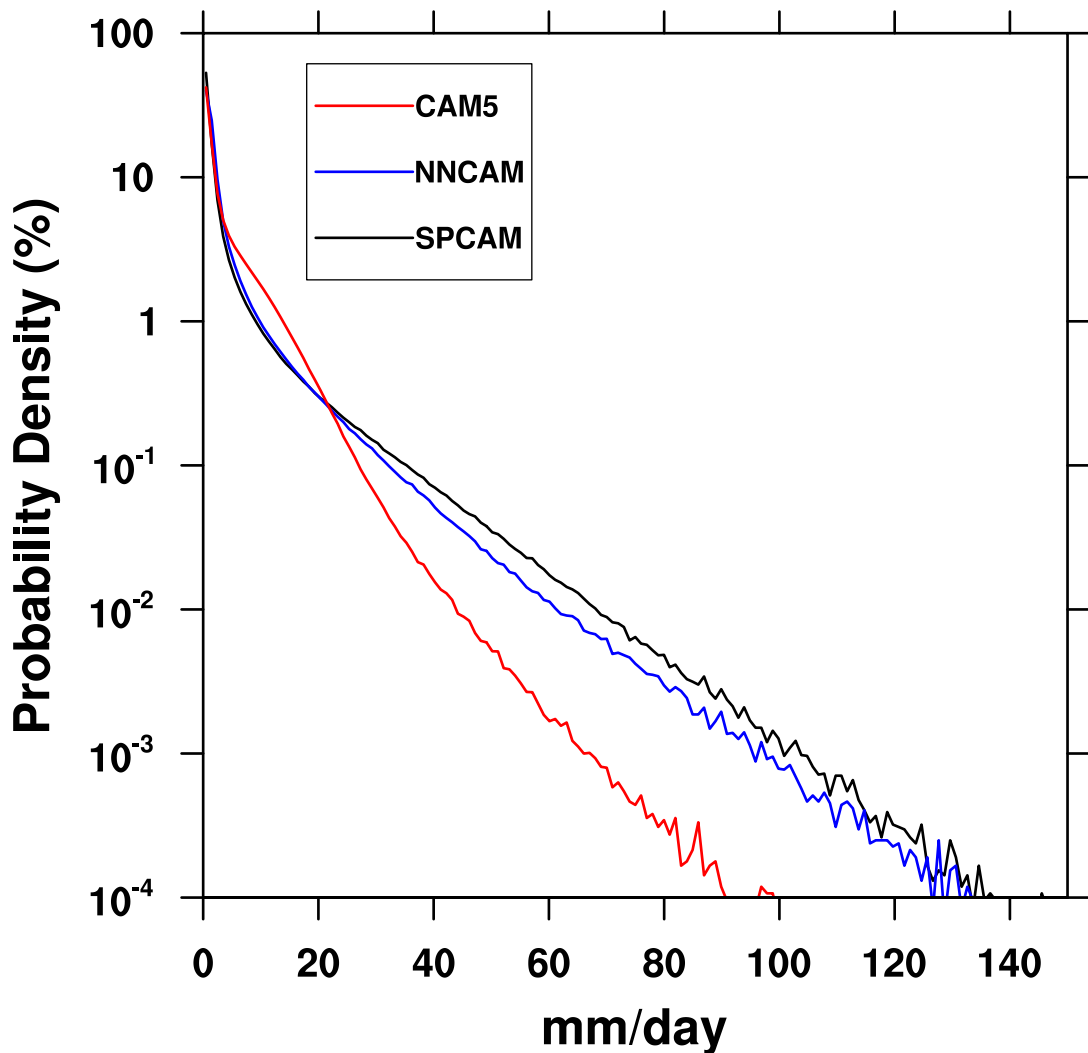

Supplement: Supplementary file 13 [file gmd-2021-299-supplement-version1.zip]

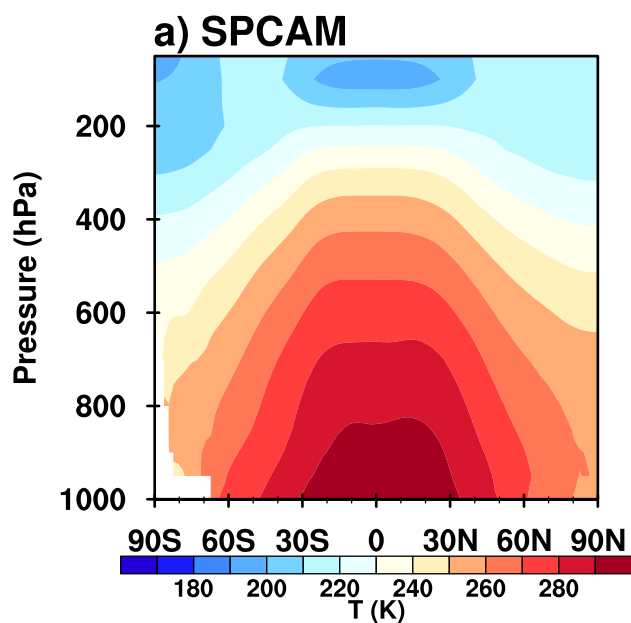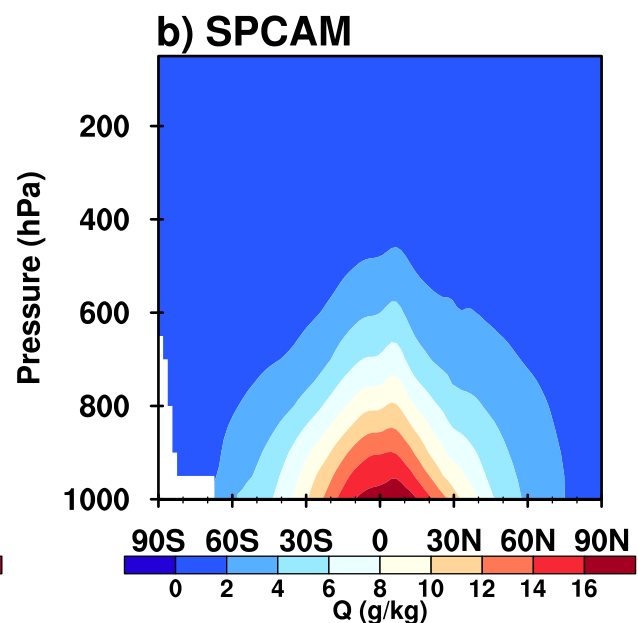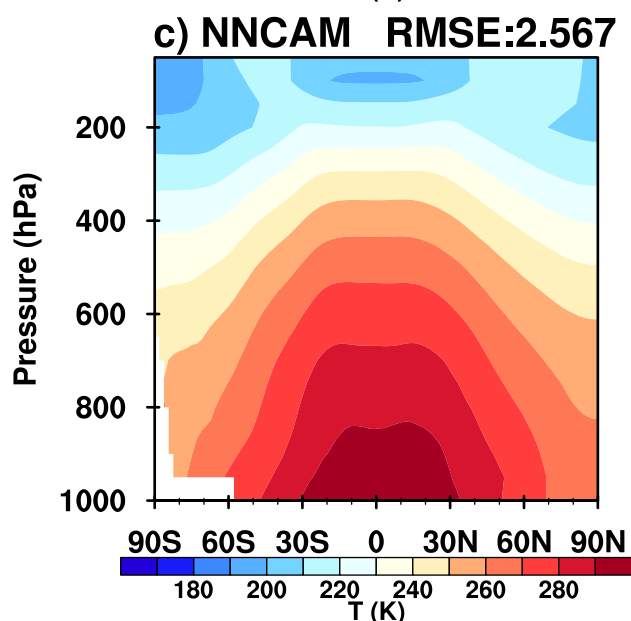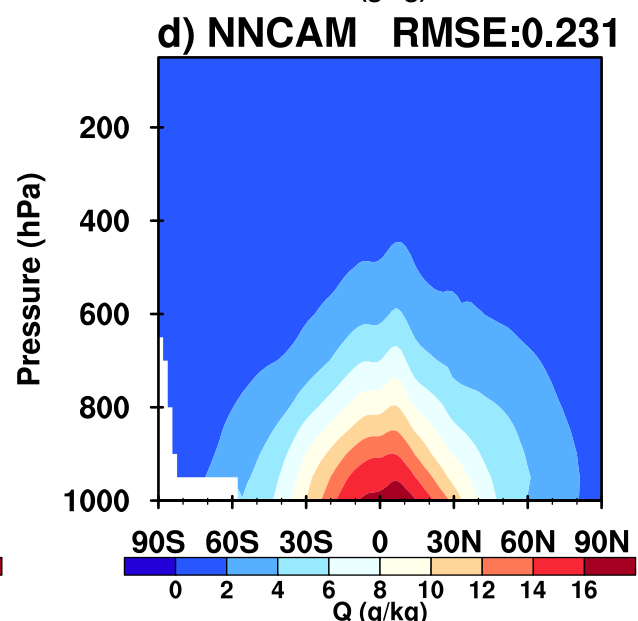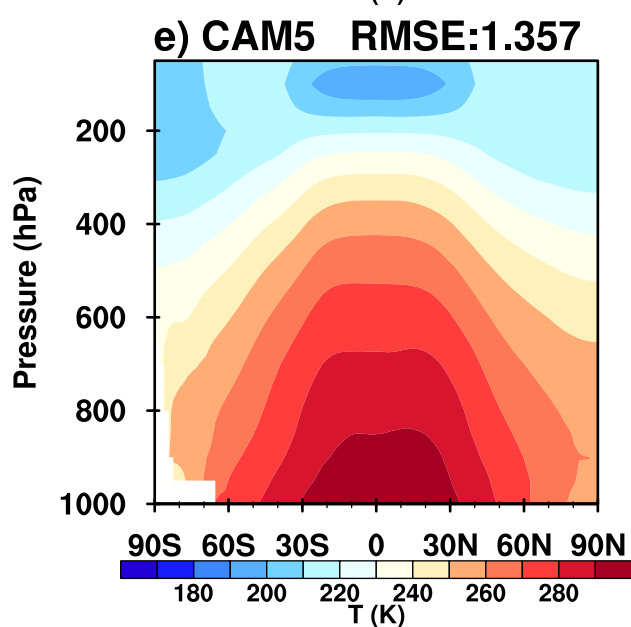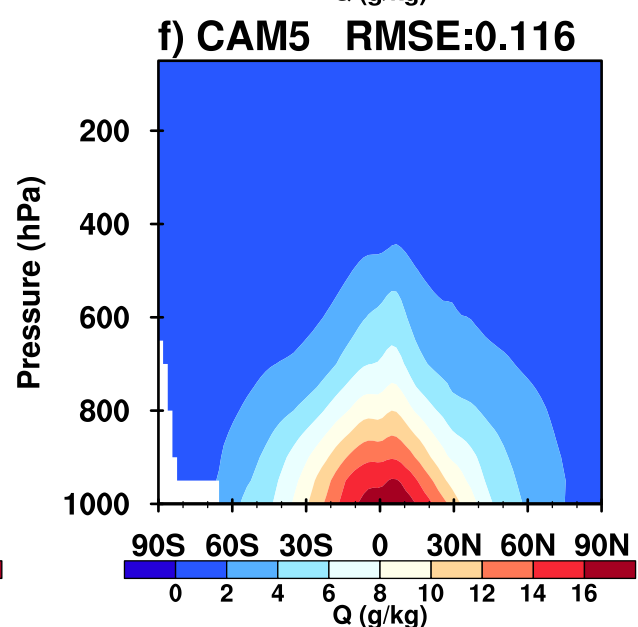

Supplement: Supplementary file 14 [file gmd-2021-299-supplement-version1.zip]

**a) NNCAM ANN mean:2.795**

**mm/day**

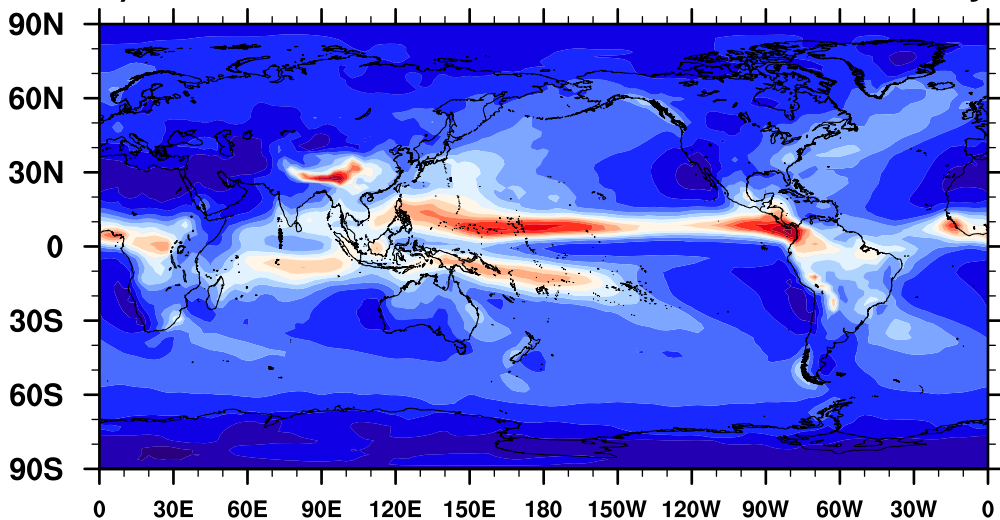

**b) NNCAM JJA mean:2.862**

**mm/day**

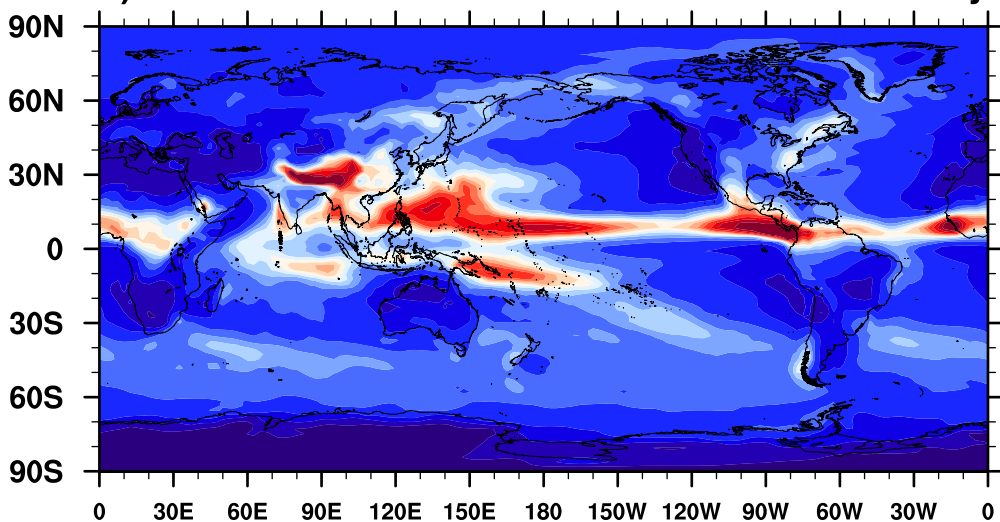

**c) NNCAM DJF mean:2.739**

**mm/day**

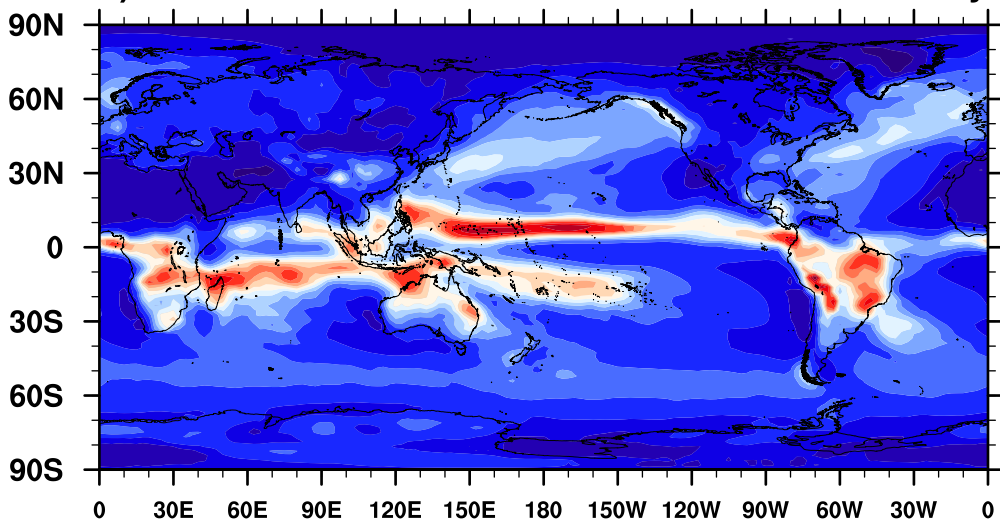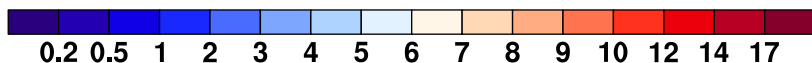

Supplement: Supplementary file 15 [file gmd-2021-299-supplement-version1.zip]

a) Precipitation  $R^2$ , NN Parameterization

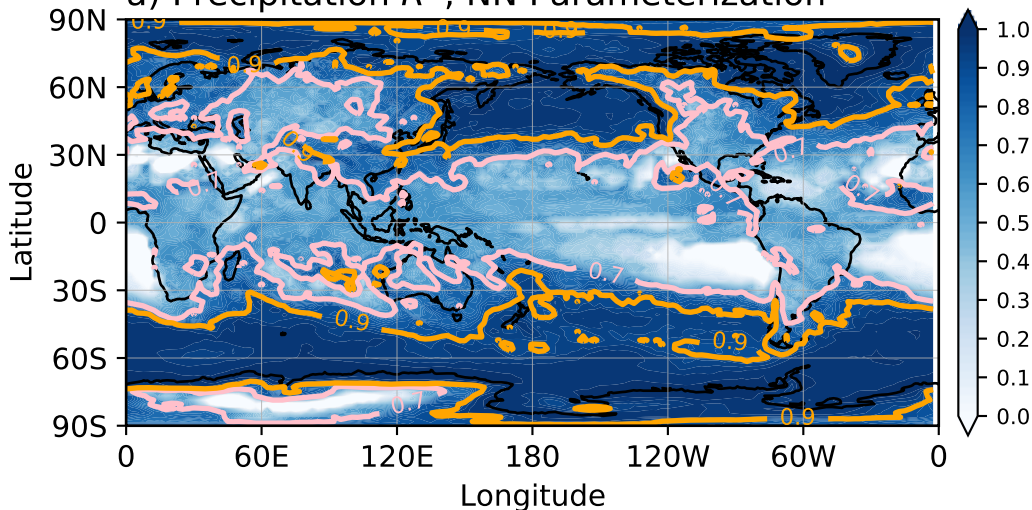

b) Precipitation  $R^2$ , CAM Parameterization

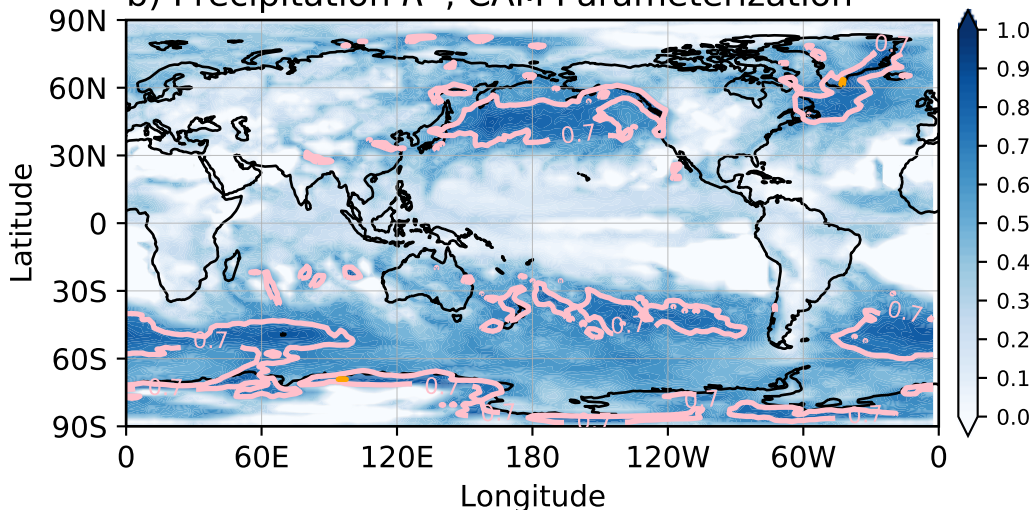

Supplement: Supplementary file 16 [file gmd-2021-299-supplement-version1.zip]

**a) NNCAM RMSE:2.978**

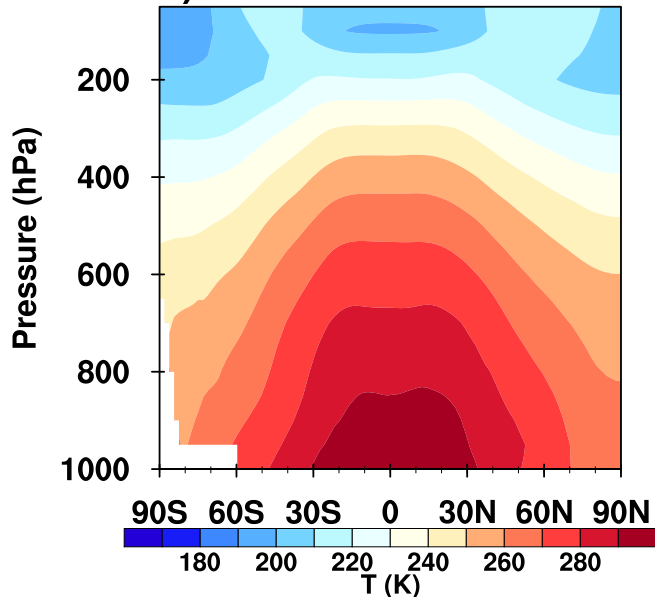

**b) NNCAM RMSE:0.291**

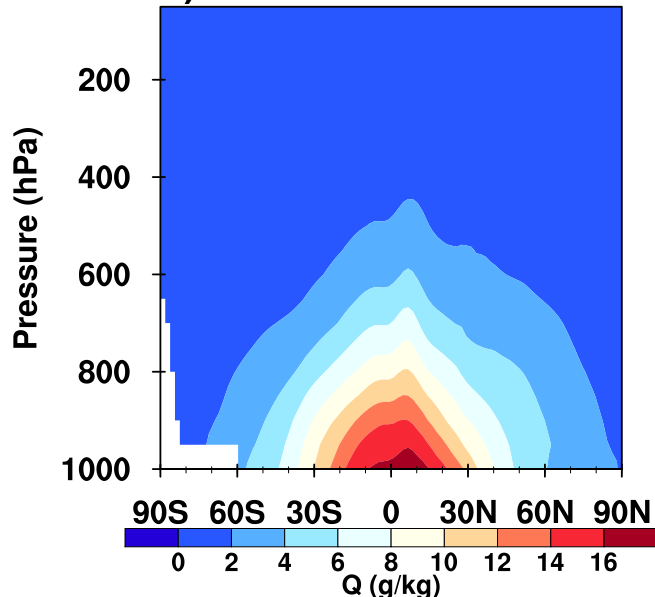

**c) Diff NNCAM Bias:0.895**

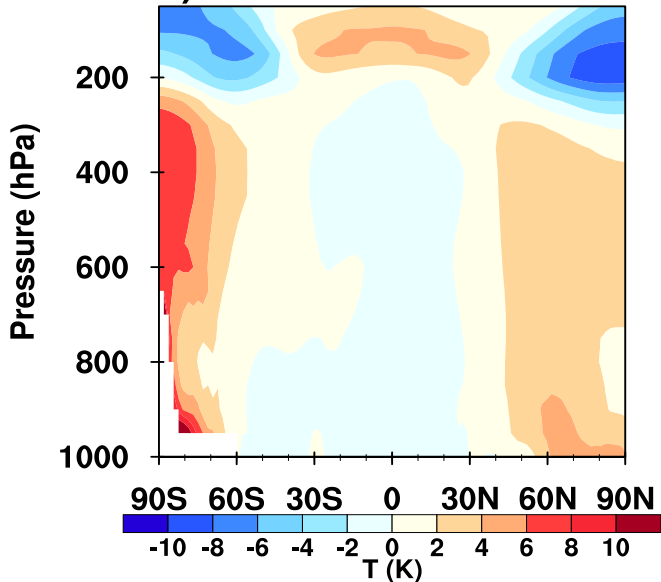

**d) Diff NNCAM Bias:0.202**

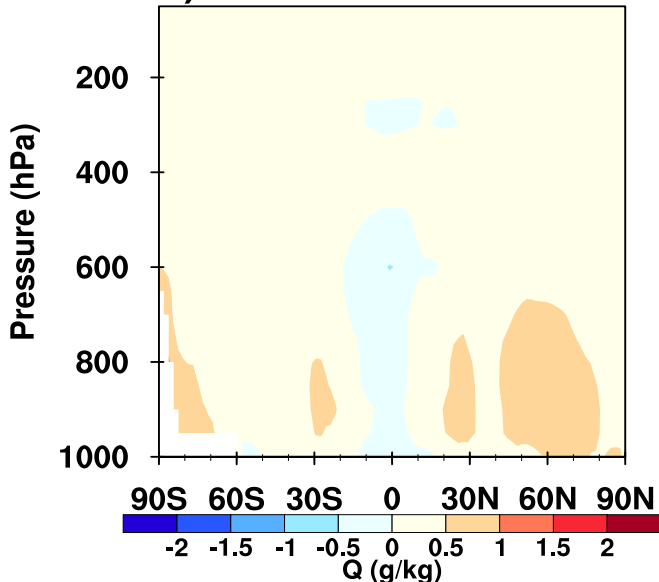

Supplement: Supplementary file 17 [file gmd-2021-299-supplement-version1.zip]

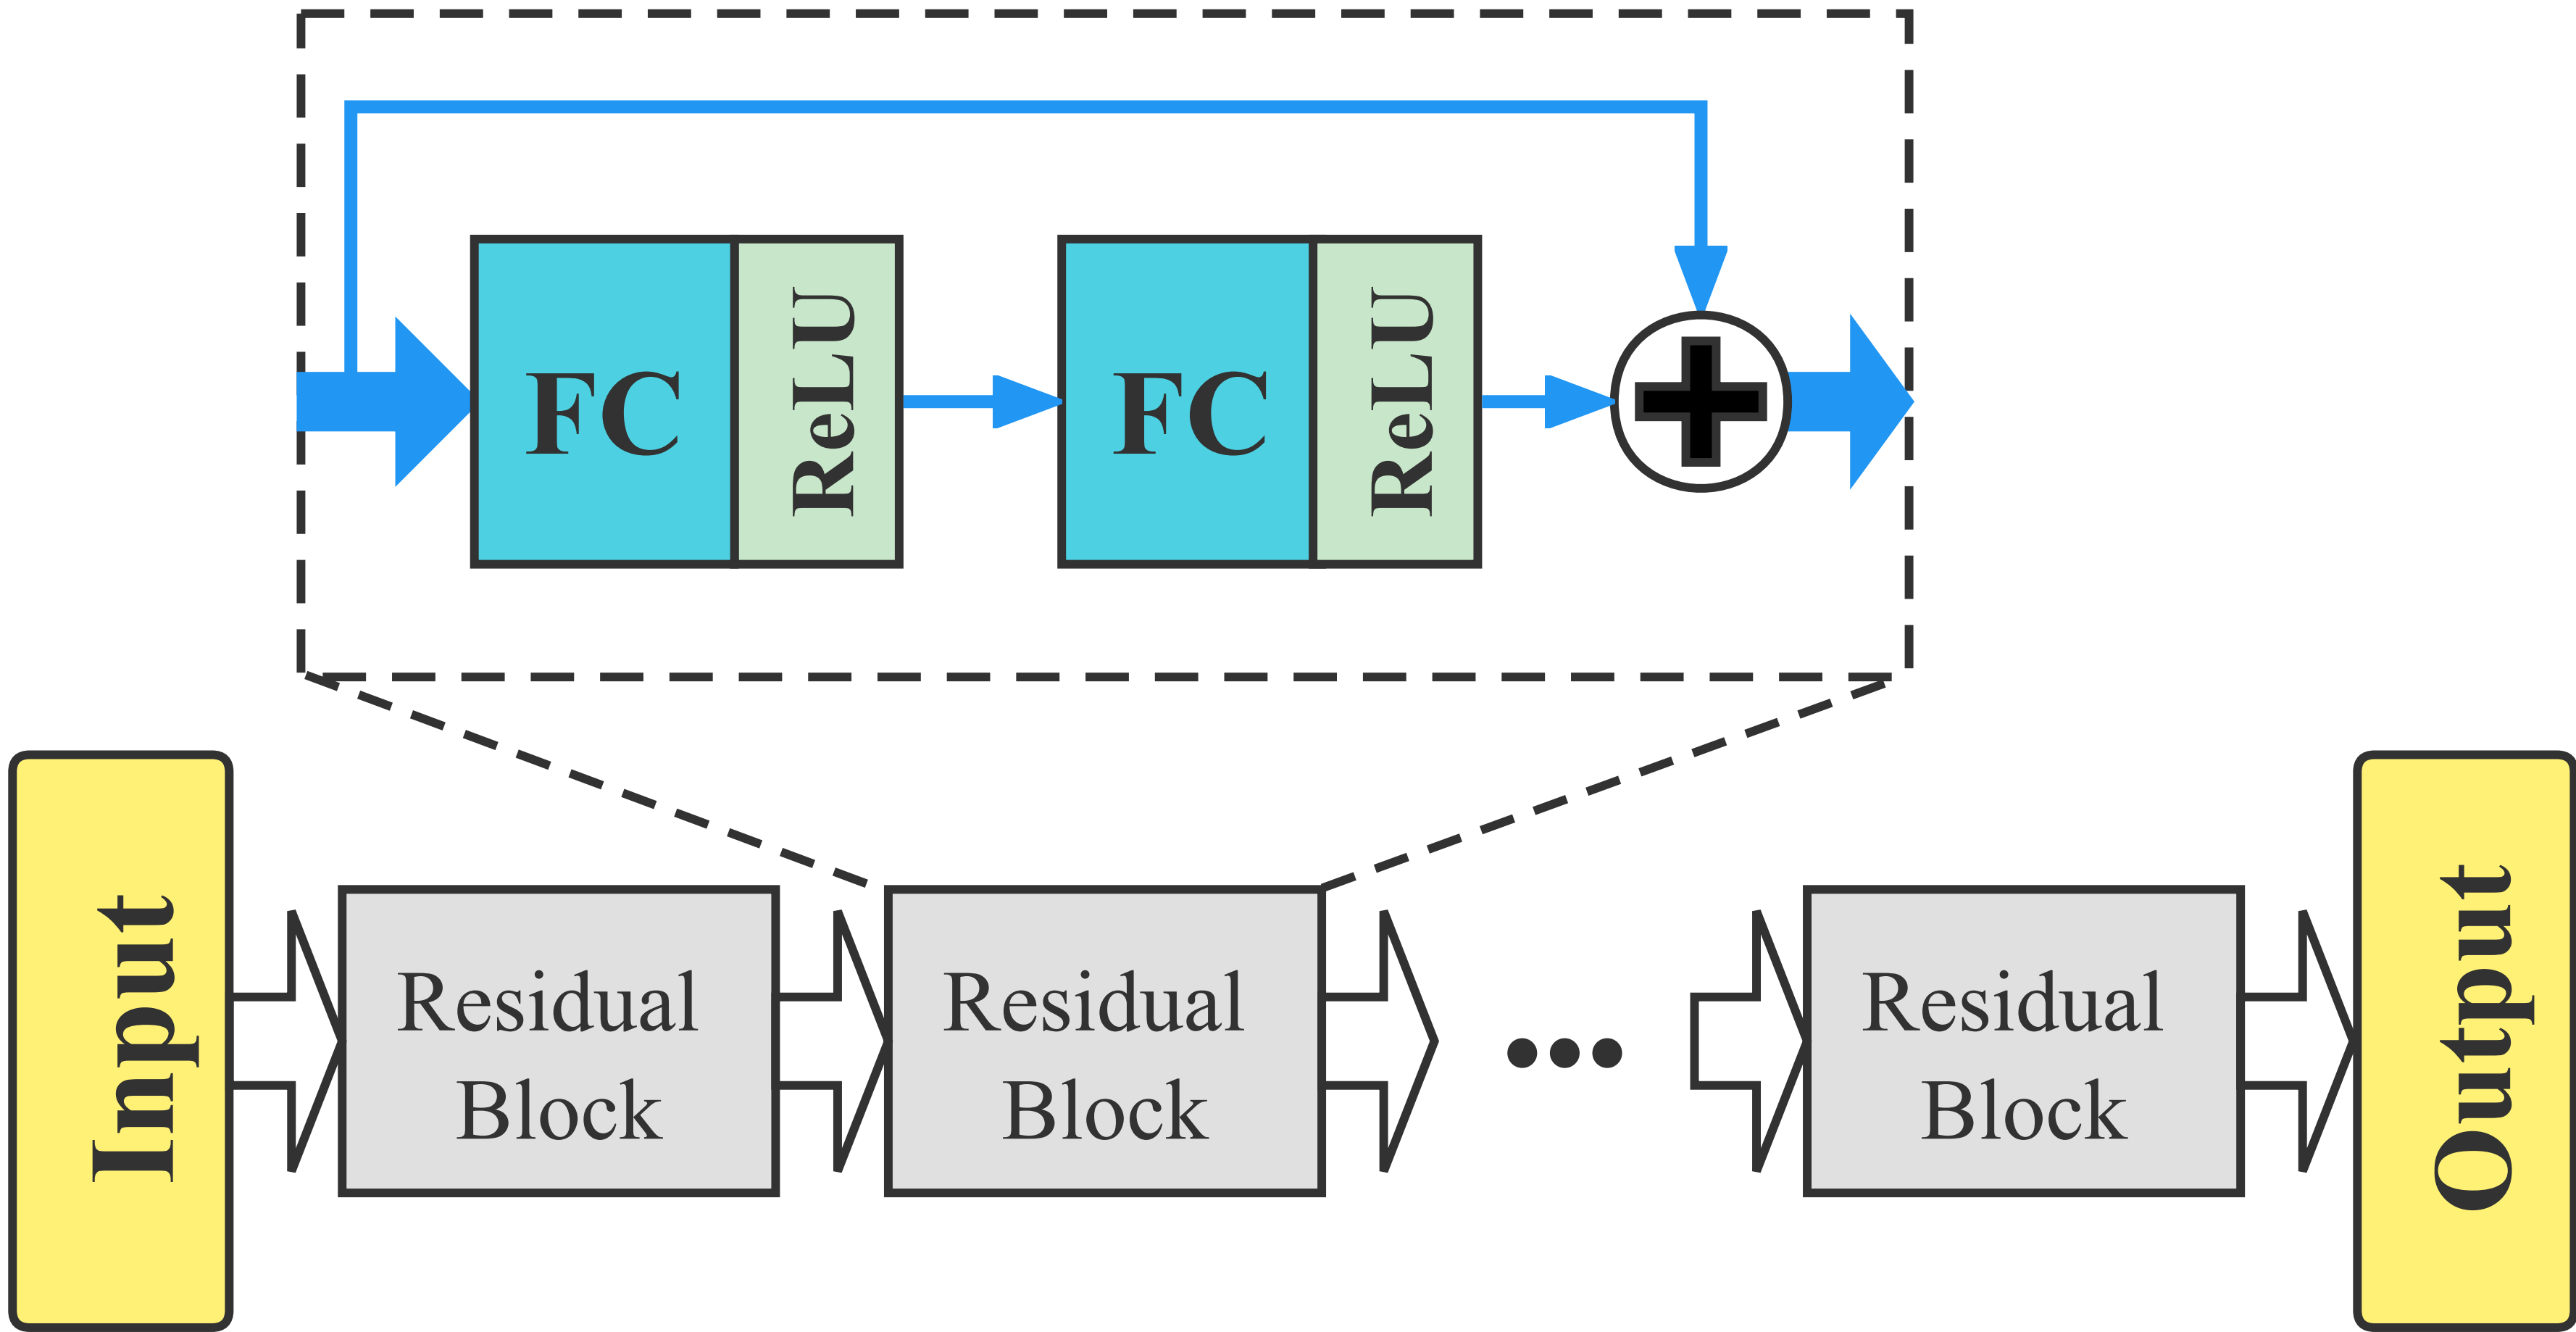

Supplement: Supplementary file 18 [file gmd-2021-299-supplement-version1.zip]

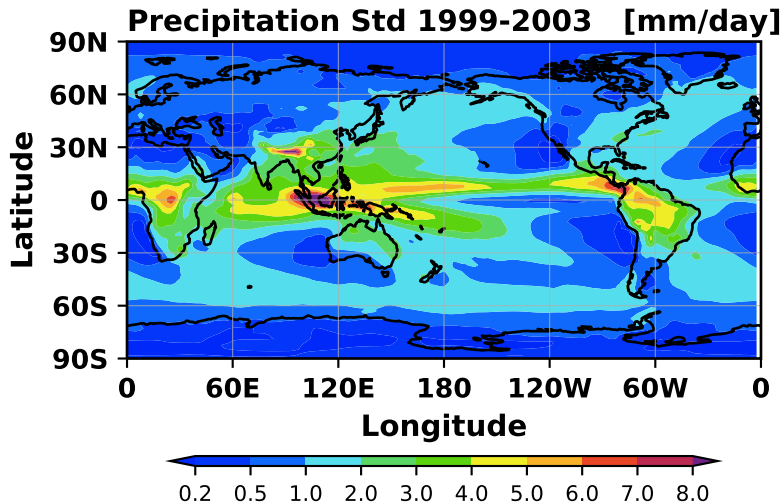

Supplement: Supplementary file 20 [file gmd-2021-299-supplement-version2.zip]

a) 30min interval Heating

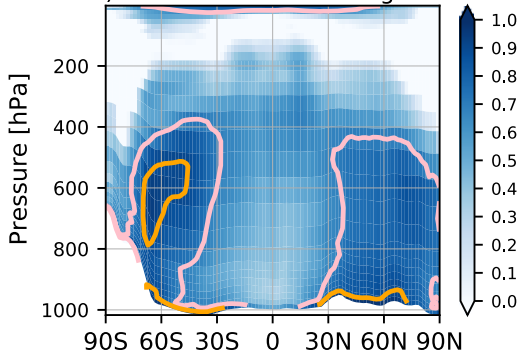

b) 30min interval Moistening

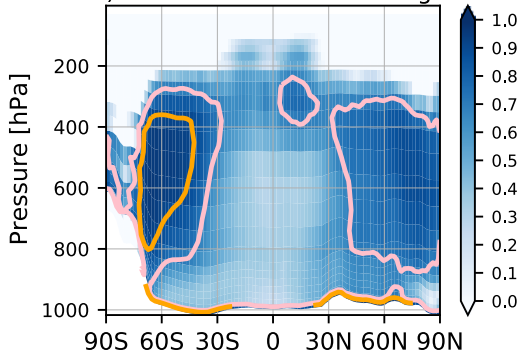

Supplement: Supplementary file 23 [file gmd-2021-299-supplement-version3.zip]

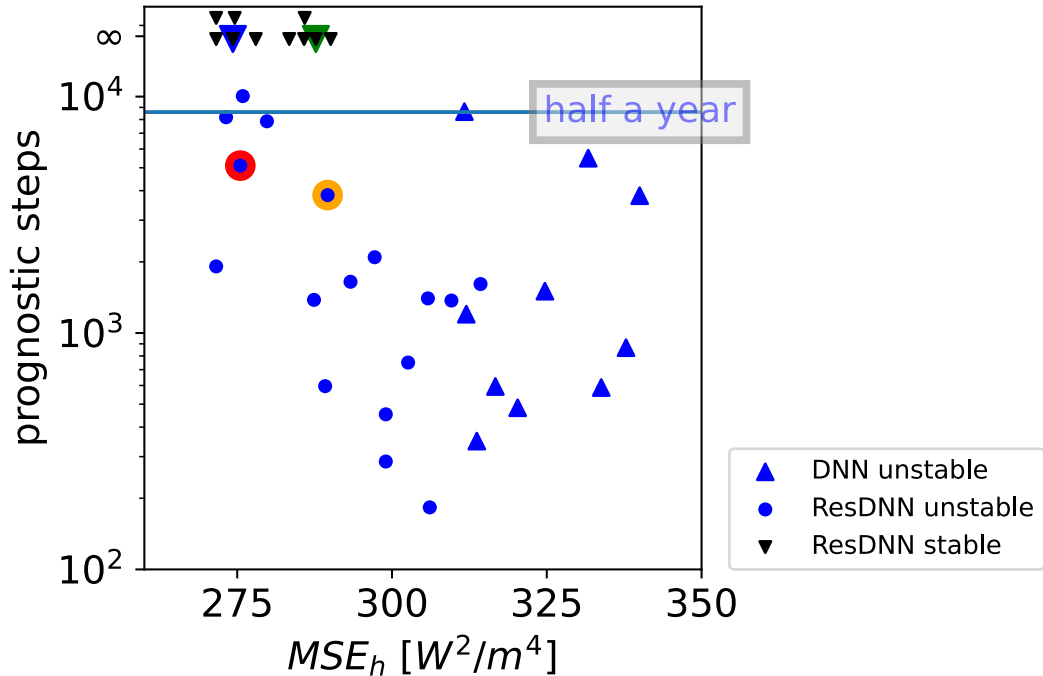

Supplement: Supplementary file 24 [file gmd-2021-299-supplement-version3.zip]

a) SPCAM

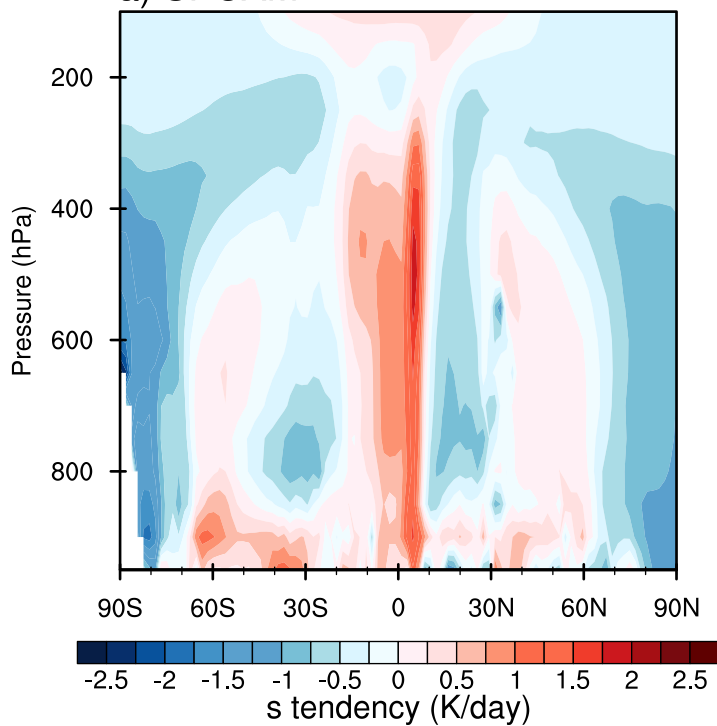

b) NN-Parameterization

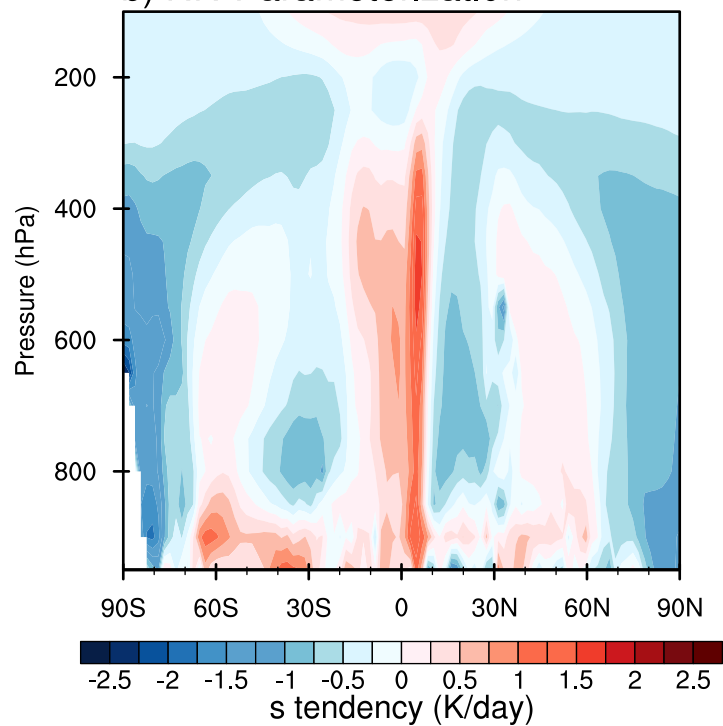

c) SPCAM

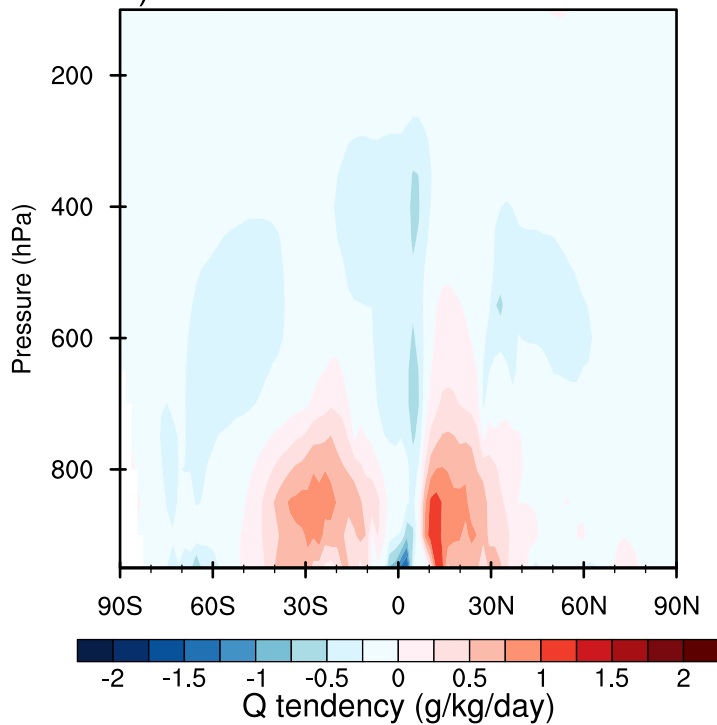

d) NN-Parameterization

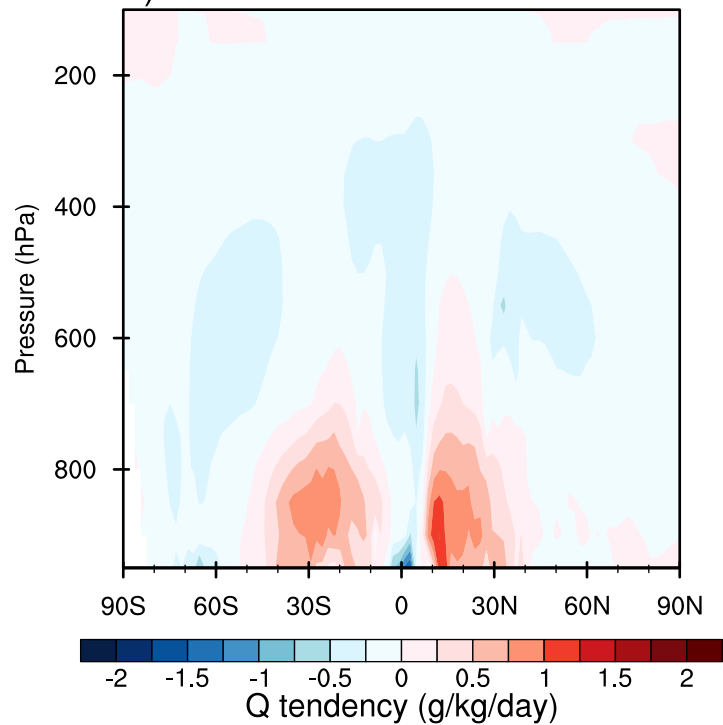

Supplement: Supplementary file 25 [file gmd-2021-299-supplement-version3.zip]

a) SPCAM, winter: 19990101-20031231

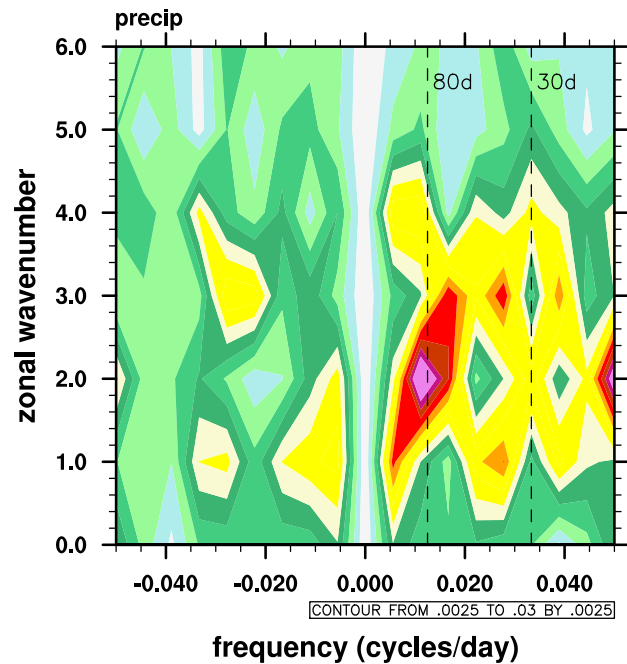

b) NNCAM, winter: 19990101-20031231

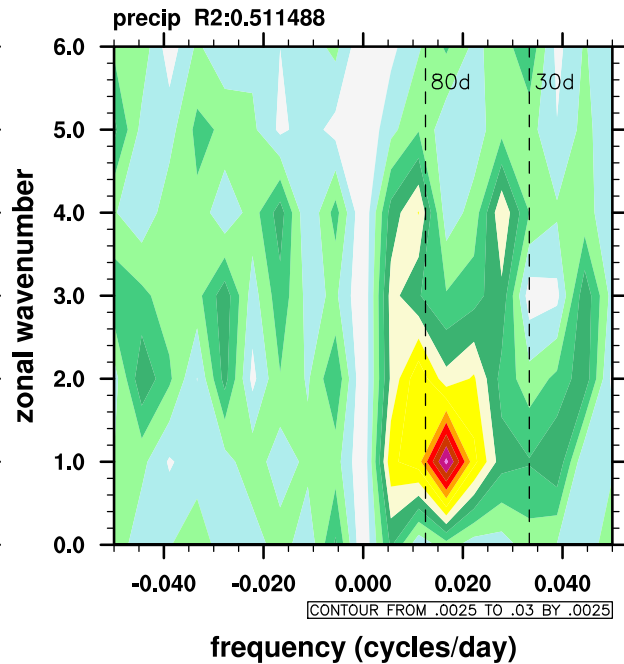

c) CAM5, winter: 19990101-20031231

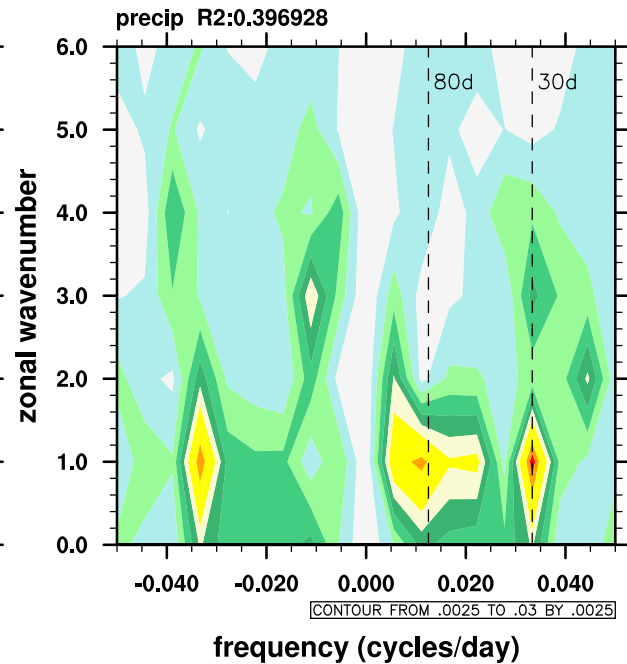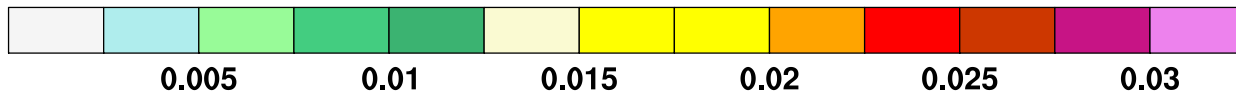

Supplement: Supplementary file 26 [file gmd-2021-299-supplement-version3.zip]

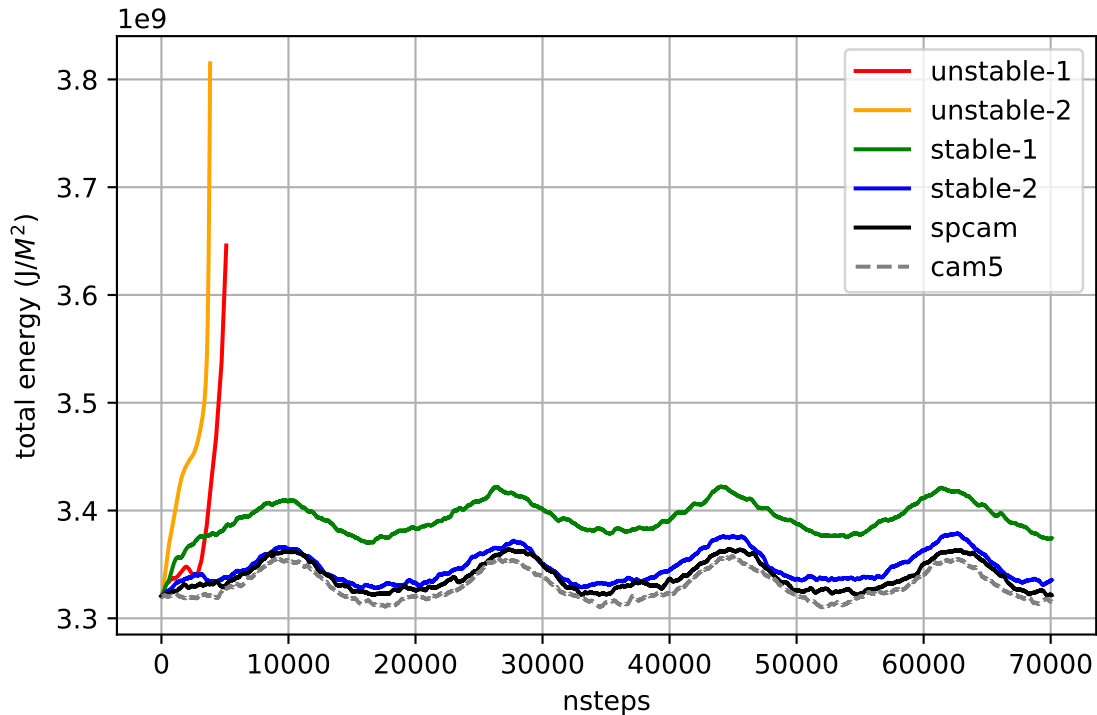

Supplement: Supplementary file 27 [file gmd-2021-299-supplement-version3.zip]

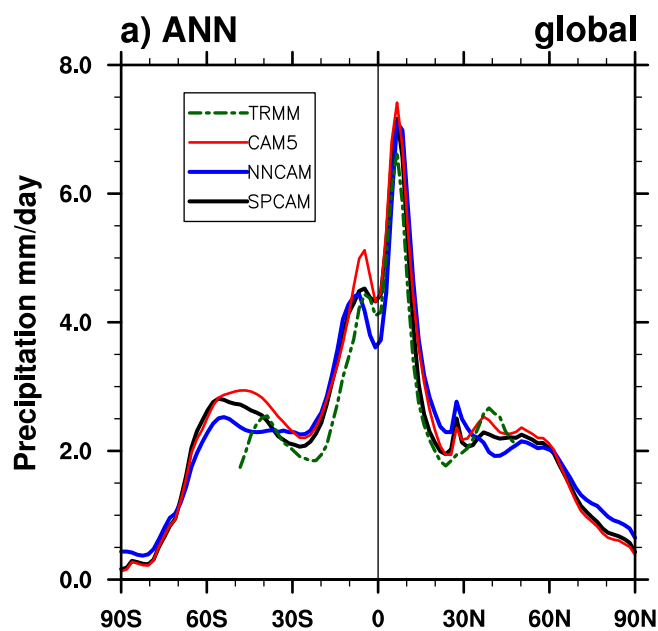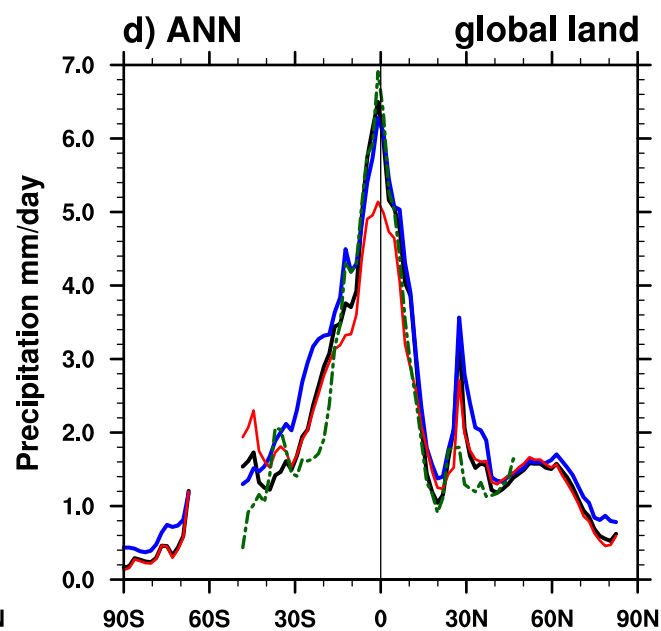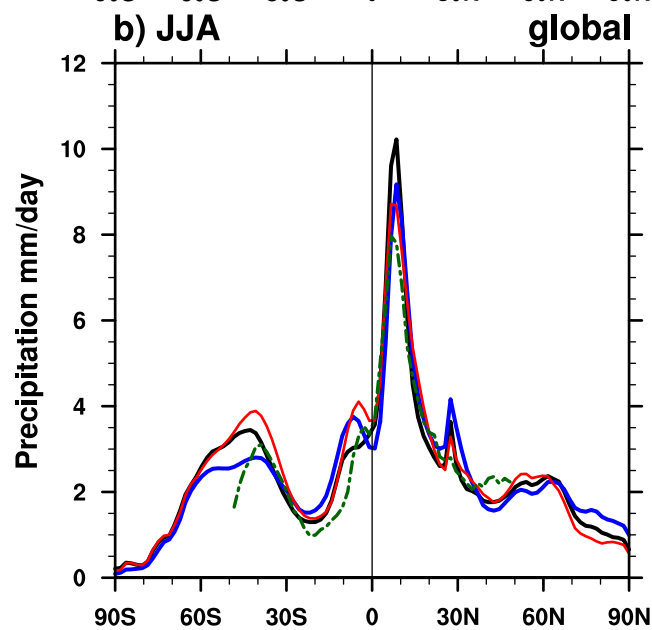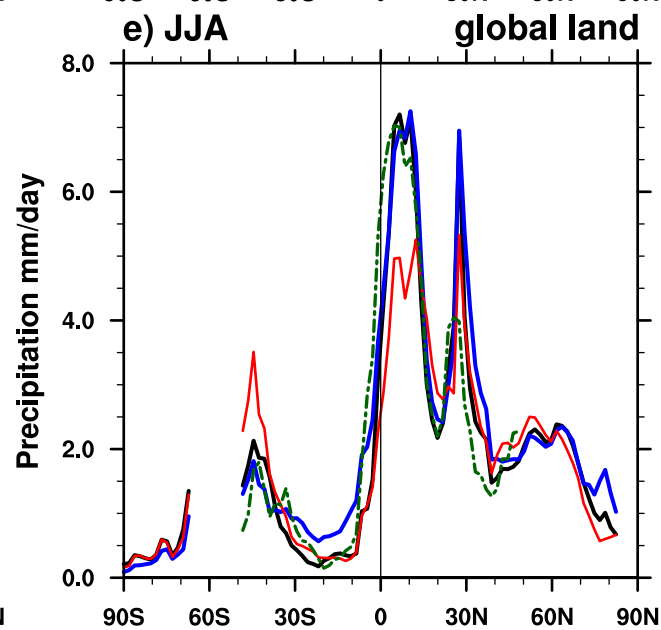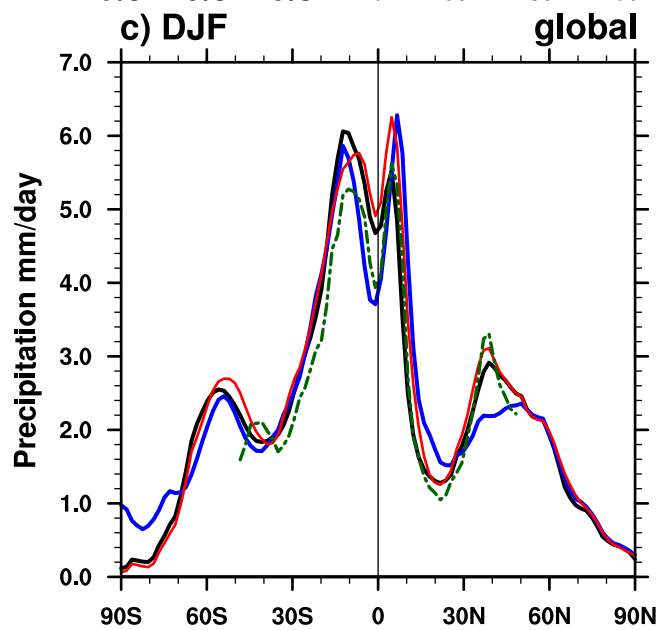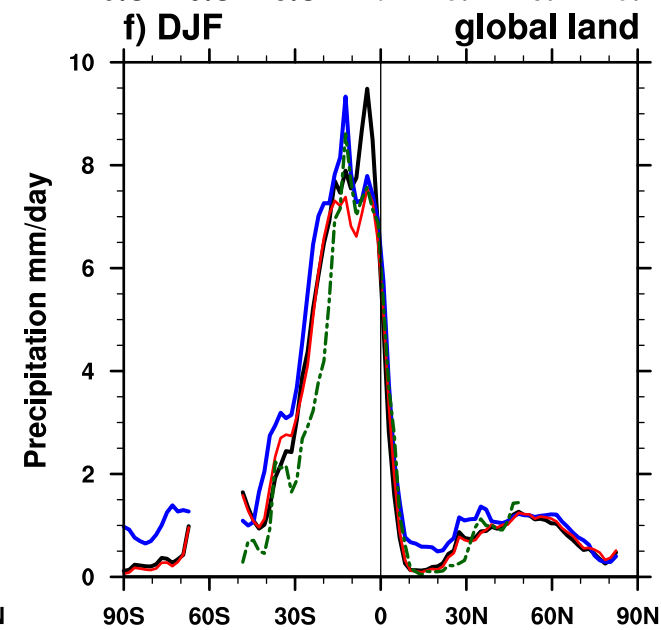

Supplement: Supplementary file 28 [file gmd-2021-299-supplement-version3.zip]
